# Supplementary material for: Identifying and characterizing lincRNA genomic clusters reveals its cooperative functions in human cancer
Source: J Transl Med. 2021 Dec 14;19:509. doi: 10.1186/s12967-021-03179-5 (PMC8672572; doi:10.1186/s12967-021-03179-5)
Supplement: Supplementary file 2 — Additional file 2. Additional tables. [file 12967_2021_3179_MOESM2_ESM.xlsx]

## Sheet: Additional Table S1
Additional Table S1: The number of TCGA samples and GTEx tissue.
Abbreviations	Cancer names	GTEx tissue	Number of TCGA Normal Samples	Number of TCGA Tumor Samples	Number of GTEx tissue
BLCA	Bladder Urothelial Carcinoma	Bladder	19	252	9
BRCA	Breast invasive carcinoma	Breast	105	837	179
CESC	Cervical squamous cell carcinoma and endocervical adenocarcinoma	Cervix Uteri	3	196	10
COAD	Colon adenocarcinoma	Colon	0	157	308
GBM	Glioblastoma multiforme	Brain	0	154	1152
HNSC	Head and Neck squamous cell carcinoma	-	42	426	-
KICH	Kidney Chromophobe	Kidney	25	66	28
KIRC	Kidney renal clear cell carcinoma	Kidney	67	448	28
KIRP	Kidney renal papillary cell carcinoma	Kidney	30	198	28
LGG	Brain Lower Grade Glioma	Brain	0	486	1152
LIHC	Liver hepatocellular carcinoma	Liver	50	200	110
LUAD	Lung adenocarcinoma	Lung	58	488	288
LUSC	Lung squamous cell carcinoma	Lung	17	220	288
OV	Ovarian serous cystadenocarcinoma	Ovary	0	412	88
PRAD	Prostate adenocarcinoma	Prostate	52	374	100
READ	Rectum adenocarcinoma	Colon	0	71	308
SKCM	Skin Cutaneous Melanoma	Skin	0	226	812
STAD	Stomach adenocarcinoma	Stomach	33	285	174
THCA	Thyroid carcinoma	Thyroid	59	497	279
UCEC	Uterine Corpus Endometrial Carcinoma	Uterus	4	316	78

## Sheet: Additional Table S2
Additional Table S2:lincRNA clusters at 60 kb.
cluster.NO	chromosome	p value of random permutation	lincRNA1	lincRNA2	lincRNA3	lincRNA4	lincRNA5	lincRNA6	lincRNA7	lincRNA8	lincRNA9	lincRNA10
Cluster1	Chr1	0.002	ENSG00000243485	ENSG00000237613	ENSG00000238009	ENSG00000239945	NA	NA	NA	NA	NA	NA
Cluster2	Chr1	0.004	ENSG00000228463	ENSG00000236743	ENSG00000236601	ENSG00000237094	NA	NA	NA	NA	NA	NA
Cluster3	Chr1	0.001	ENSG00000237491	ENSG00000177757	ENSG00000225880	ENSG00000230368	ENSG00000272438	ENSG00000230699	ENSG00000241180	ENSG00000223764	NA	NA
Cluster4	Chr1	0.001	ENSG00000226029	ENSG00000261135	ENSG00000224174	ENSG00000233421	NA	NA	NA	NA	NA	NA
Cluster5	Chr1	0	ENSG00000271732	ENSG00000282143	ENSG00000279151	ENSG00000282740	NA	NA	NA	NA	NA	NA
Cluster6	Chr1	0	ENSG00000223643	ENSG00000230239	ENSG00000228549	ENSG00000238142	ENSG00000272426	NA	NA	NA	NA	NA
Cluster7	Chr1	0.004	ENSG00000272226	ENSG00000231740	ENSG00000232453	ENSG00000237352	NA	NA	NA	NA	NA	NA
Cluster8	Chr1	0	ENSG00000273264	ENSG00000282057	ENSG00000272691	ENSG00000230285	NA	NA	NA	NA	NA	NA
Cluster9	Chr1	0.002	ENSG00000234283	ENSG00000238107	ENSG00000224481	ENSG00000272824	NA	NA	NA	NA	NA	NA
Cluster10	Chr1	0	ENSG00000231966	ENSG00000272906	ENSG00000261831	ENSG00000260360	NA	NA	NA	NA	NA	NA
Cluster11	Chr1	0.001	ENSG00000229989	ENSG00000225172	ENSG00000233410	ENSG00000235492	NA	NA	NA	NA	NA	NA
Cluster12	Chr1	0.005	ENSG00000227925	ENSG00000238042	ENSG00000228437	ENSG00000232679	ENSG00000236230	NA	NA	NA	NA	NA
Cluster13	Chr1	0.001	ENSG00000231768	ENSG00000230404	ENSG00000224939	ENSG00000272362	ENSG00000228044	ENSG00000241475	ENSG00000230628	ENSG00000282097	ENSG00000227630	ENSG00000279261
Cluster14	Chr2	0	ENSG00000235779	ENSG00000277997	ENSG00000233684	ENSG00000236856	ENSG00000226277	NA	NA	NA	NA	NA
Cluster15	Chr2	0	ENSG00000223985	ENSG00000284452	ENSG00000225942	ENSG00000233633	NA	NA	NA	NA	NA	NA
Cluster16	Chr2	0.001	ENSG00000227713	ENSG00000272342	ENSG00000231173	ENSG00000223751	ENSG00000237667	ENSG00000228799	NA	NA	NA	NA
Cluster17	Chr2	0.001	ENSG00000237720	ENSG00000228391	ENSG00000234423	ENSG00000236760	ENSG00000226649	NA	NA	NA	NA	NA
Cluster18	Chr2	0	ENSG00000260476	ENSG00000260077	ENSG00000233502	ENSG00000272524	ENSG00000163009	NA	NA	NA	NA	NA
Cluster19	Chr2	0	ENSG00000223530	ENSG00000233714	ENSG00000223634	ENSG00000235497	NA	NA	NA	NA	NA	NA
Cluster20	Chr2	0.004	ENSG00000226785	ENSG00000228262	ENSG00000272027	ENSG00000232153	NA	NA	NA	NA	NA	NA
Cluster21	Chr2	0	ENSG00000224739	ENSG00000231826	ENSG00000233978	ENSG00000230587	NA	NA	NA	NA	NA	NA
Cluster22	Chr2	0	ENSG00000259439	ENSG00000236502	ENSG00000225156	ENSG00000231156	NA	NA	NA	NA	NA	NA
Cluster23	Chr2	0.001	ENSG00000260977	ENSG00000222005	ENSG00000239332	ENSG00000226548	NA	NA	NA	NA	NA	NA
Cluster24	Chr2	0.002	ENSG00000232597	ENSG00000236141	ENSG00000256637	ENSG00000228968	NA	NA	NA	NA	NA	NA
Cluster25	Chr2	0	ENSG00000227157	ENSG00000225765	ENSG00000235597	ENSG00000234781	NA	NA	NA	NA	NA	NA
Cluster26	Chr2	0.002	ENSG00000229457	ENSG00000225588	ENSG00000237880	ENSG00000224568	NA	NA	NA	NA	NA	NA
Cluster27	Chr2	0	ENSG00000236049	ENSG00000237220	ENSG00000232359	ENSG00000224048	NA	NA	NA	NA	NA	NA
Cluster28	Chr2	0.002	ENSG00000224099	ENSG00000271893	ENSG00000223466	ENSG00000234919	NA	NA	NA	NA	NA	NA
Cluster29	Chr2	0	ENSG00000224342	ENSG00000234902	ENSG00000225916	ENSG00000240440	ENSG00000229647	ENSG00000225064	NA	NA	NA	NA
Cluster30	Chr2	0.001	ENSG00000225166	ENSG00000228618	ENSG00000234938	ENSG00000237525	NA	NA	NA	NA	NA	NA
Cluster31	Chr3	0	ENSG00000239921	ENSG00000240562	ENSG00000282975	ENSG00000282860	NA	NA	NA	NA	NA	NA
Cluster32	Chr3	0.002	ENSG00000241131	ENSG00000241792	ENSG00000244650	ENSG00000243347	ENSG00000242440	NA	NA	NA	NA	NA
Cluster33	Chr3	0.001	ENSG00000241220	ENSG00000241912	ENSG00000243012	ENSG00000237787	NA	NA	NA	NA	NA	NA
Cluster34	Chr3	0	ENSG00000272970	ENSG00000273403	ENSG00000272922	ENSG00000229433	NA	NA	NA	NA	NA	NA
Cluster35	Chr3	0	ENSG00000236864	ENSG00000224187	ENSG00000225058	ENSG00000236412	NA	NA	NA	NA	NA	NA
Cluster36	Chr3	0.001	ENSG00000225742	ENSG00000238097	ENSG00000228271	ENSG00000214145	NA	NA	NA	NA	NA	NA
Cluster37	Chr3	0.001	ENSG00000233987	ENSG00000237222	ENSG00000230401	ENSG00000238031	NA	NA	NA	NA	NA	NA
Cluster38	Chr3	0	ENSG00000235126	ENSG00000229912	ENSG00000237167	ENSG00000272989	NA	NA	NA	NA	NA	NA
Cluster39	Chr4	0.003	ENSG00000248227	ENSG00000249534	ENSG00000249667	ENSG00000251635	ENSG00000271958	NA	NA	NA	NA	NA
Cluster40	Chr4	0.004	ENSG00000251185	ENSG00000251454	ENSG00000251383	ENSG00000248646	ENSG00000250735	NA	NA	NA	NA	NA
Cluster41	Chr4	0.001	ENSG00000251432	ENSG00000273077	ENSG00000248187	ENSG00000248802	NA	NA	NA	NA	NA	NA
Cluster42	Chr4	0	ENSG00000249091	ENSG00000248397	ENSG00000251372	ENSG00000249381	NA	NA	NA	NA	NA	NA
Cluster43	Chr5	0.001	ENSG00000249521	ENSG00000248311	ENSG00000248467	ENSG00000249941	NA	NA	NA	NA	NA	NA
Cluster44	Chr5	0	ENSG00000251506	ENSG00000250481	ENSG00000215231	ENSG00000251426	ENSG00000250529	NA	NA	NA	NA	NA
Cluster45	Chr5	0.005	ENSG00000248677	ENSG00000251365	ENSG00000272071	ENSG00000249734	ENSG00000250060	ENSG00000250974	NA	NA	NA	NA
Cluster46	Chr5	0	ENSG00000251250	ENSG00000251678	ENSG00000250668	ENSG00000249638	ENSG00000223597	NA	NA	NA	NA	NA
Cluster47	Chr5	0	ENSG00000249807	ENSG00000260515	ENSG00000271998	ENSG00000272417	NA	NA	NA	NA	NA	NA
Cluster48	Chr5	0.001	ENSG00000248223	ENSG00000249199	ENSG00000250822	ENSG00000248455	ENSG00000249662	NA	NA	NA	NA	NA
Cluster49	Chr5	0.003	ENSG00000248539	ENSG00000250032	ENSG00000251518	ENSG00000248533	ENSG00000250003	ENSG00000248461	NA	NA	NA	NA
Cluster50	Chr5	0	ENSG00000251601	ENSG00000250360	ENSG00000251573	ENSG00000248918	NA	NA	NA	NA	NA	NA
Cluster51	Chr5	0	ENSG00000249335	ENSG00000250066	ENSG00000249352	ENSG00000250237	NA	NA	NA	NA	NA	NA
Cluster52	Chr5	0.004	ENSG00000248942	ENSG00000251041	ENSG00000249343	ENSG00000250446	ENSG00000248673	NA	NA	NA	NA	NA
Cluster53	Chr5	0.004	ENSG00000250156	ENSG00000271904	ENSG00000245526	ENSG00000250377	NA	NA	NA	NA	NA	NA
Cluster54	Chr5	0.001	ENSG00000212930	ENSG00000251093	ENSG00000234292	ENSG00000248323	ENSG00000271762	NA	NA	NA	NA	NA
Cluster55	Chr5	0.003	ENSG00000272255	ENSG00000250635	ENSG00000249526	ENSG00000249131	ENSG00000251387	ENSG00000271792	NA	NA	NA	NA
Cluster56	Chr5	0.004	ENSG00000253792	ENSG00000253673	ENSG00000253449	ENSG00000253424	ENSG00000253134	ENSG00000276778	ENSG00000254350	ENSG00000272085	ENSG00000254135	NA
Cluster57	Chr5	0.002	ENSG00000253959	ENSG00000253428	ENSG00000253686	ENSG00000254211	NA	NA	NA	NA	NA	NA
Cluster58	Chr6	0.001	ENSG00000272463	ENSG00000271727	ENSG00000271911	ENSG00000272485	NA	NA	NA	NA	NA	NA
Cluster59	Chr6	0.001	ENSG00000228478	ENSG00000183674	ENSG00000229401	ENSG00000231056	NA	NA	NA	NA	NA	NA
Cluster60	Chr6	0.001	ENSG00000272541	ENSG00000271761	ENSG00000272316	ENSG00000283352	ENSG00000225096	NA	NA	NA	NA	NA
Cluster61	Chr6	0.004	ENSG00000236700	ENSG00000232310	ENSG00000229722	ENSG00000227723	NA	NA	NA	NA	NA	NA
Cluster62	Chr6	0	ENSG00000234768	ENSG00000237987	ENSG00000228361	ENSG00000234647	NA	NA	NA	NA	NA	NA
Cluster63	Chr6	0	ENSG00000234986	ENSG00000213863	ENSG00000230423	ENSG00000225532	NA	NA	NA	NA	NA	NA
Cluster64	Chr7	0.003	ENSG00000283061	ENSG00000232325	ENSG00000242611	ENSG00000242474	ENSG00000240859	ENSG00000261795	ENSG00000239715	NA	NA	NA
Cluster65	Chr7	0.001	ENSG00000272953	ENSG00000234432	ENSG00000273084	ENSG00000230733	NA	NA	NA	NA	NA	NA
Cluster66	Chr7	0	ENSG00000226587	ENSG00000229301	ENSG00000230600	ENSG00000232817	ENSG00000227305	ENSG00000234387	NA	NA	NA	NA
Cluster67	Chr7	0.001	ENSG00000233559	ENSG00000226380	ENSG00000271204	ENSG00000273319	NA	NA	NA	NA	NA	NA
Cluster68	Chr8	0	ENSG00000253696	ENSG00000253764	ENSG00000270988	ENSG00000253805	NA	NA	NA	NA	NA	NA
Cluster69	Chr8	0.002	ENSG00000253444	ENSG00000282686	ENSG00000282142	ENSG00000253855	NA	NA	NA	NA	NA	NA
Cluster70	Chr8	0.002	ENSG00000253426	ENSG00000279949	ENSG00000253252	ENSG00000248538	ENSG00000254235	NA	NA	NA	NA	NA
Cluster71	Chr8	0	ENSG00000254260	ENSG00000254092	ENSG00000253147	ENSG00000254026	ENSG00000253199	ENSG00000254040	NA	NA	NA	NA
Cluster72	Chr8	0.002	ENSG00000251191	ENSG00000253490	ENSG00000248964	ENSG00000254086	ENSG00000253604	ENSG00000253279	NA	NA	NA	NA
Cluster73	Chr8	0	ENSG00000253140	ENSG00000253688	ENSG00000233858	ENSG00000253702	ENSG00000253455	ENSG00000253892	NA	NA	NA	NA
Cluster74	Chr8	0	ENSG00000253301	ENSG00000253614	ENSG00000215117	ENSG00000253871	NA	NA	NA	NA	NA	NA
Cluster75	Chr8	0.001	ENSG00000253371	ENSG00000253634	ENSG00000253177	ENSG00000254020	ENSG00000253577	NA	NA	NA	NA	NA
Cluster76	Chr8	0	ENSG00000248599	ENSG00000253395	ENSG00000253737	ENSG00000261087	ENSG00000271882	ENSG00000253679	ENSG00000253282	NA	NA	NA
Cluster77	Chr8	0.002	ENSG00000253573	ENSG00000253438	ENSG00000253264	ENSG00000282961	NA	NA	NA	NA	NA	NA
Cluster78	Chr8	0	ENSG00000259820	ENSG00000254028	ENSG00000253433	ENSG00000251218	NA	NA	NA	NA	NA	NA
Cluster79	Chr9	0	ENSG00000218839	ENSG00000277631	ENSG00000227917	ENSG00000231808	NA	NA	NA	NA	NA	NA
Cluster80	Chr9	0	ENSG00000154537	ENSG00000235659	ENSG00000223379	ENSG00000229697	NA	NA	NA	NA	NA	NA
Cluster81	Chr9	0	ENSG00000235007	ENSG00000241084	ENSG00000224307	ENSG00000179082	ENSG00000268615	ENSG00000233901	NA	NA	NA	NA
Cluster82	Chr10	0.002	ENSG00000223784	ENSG00000281186	ENSG00000238266	ENSG00000234248	NA	NA	NA	NA	NA	NA
Cluster83	Chr10	0.001	ENSG00000204187	ENSG00000226808	ENSG00000236769	ENSG00000227029	ENSG00000233395	NA	NA	NA	NA	NA
Cluster84	Chr10	0.002	ENSG00000237579	ENSG00000229649	ENSG00000225208	ENSG00000230967	NA	NA	NA	NA	NA	NA
Cluster85	Chr11	0	ENSG00000270105	ENSG00000270030	ENSG00000255328	ENSG00000270972	NA	NA	NA	NA	NA	NA
Cluster86	Chr11	0	ENSG00000255411	ENSG00000254927	ENSG00000254930	ENSG00000254438	NA	NA	NA	NA	NA	NA
Cluster87	Chr11	0.001	ENSG00000254946	ENSG00000254789	ENSG00000254695	ENSG00000254645	NA	NA	NA	NA	NA	NA
Cluster88	Chr11	0.002	ENSG00000255388	ENSG00000255171	ENSG00000255279	ENSG00000254822	NA	NA	NA	NA	NA	NA
Cluster89	Chr11	0	ENSG00000255426	ENSG00000255226	ENSG00000205106	ENSG00000255447	NA	NA	NA	NA	NA	NA
Cluster90	Chr11	0.001	ENSG00000254653	ENSG00000255314	ENSG00000255269	ENSG00000254639	NA	NA	NA	NA	NA	NA
Cluster91	Chr11	0	ENSG00000255931	ENSG00000256443	ENSG00000250230	ENSG00000255947	NA	NA	NA	NA	NA	NA
Cluster92	Chr11	0	ENSG00000231680	ENSG00000231492	ENSG00000181908	ENSG00000232500	NA	NA	NA	NA	NA	NA
Cluster93	Chr11	0.001	ENSG00000245532	ENSG00000279243	ENSG00000251562	ENSG00000270117	NA	NA	NA	NA	NA	NA
Cluster94	Chr11	0.003	ENSG00000260877	ENSG00000259854	ENSG00000255980	ENSG00000255606	ENSG00000261347	ENSG00000255774	NA	NA	NA	NA
Cluster95	Chr11	0	ENSG00000260348	ENSG00000260679	ENSG00000255191	ENSG00000254605	ENSG00000248844	NA	NA	NA	NA	NA
Cluster96	Chr11	0.001	ENSG00000255363	ENSG00000255479	ENSG00000254810	ENSG00000254975	NA	NA	NA	NA	NA	NA
Cluster97	Chr11	0.001	ENSG00000256281	ENSG00000255689	ENSG00000255599	ENSG00000260254	ENSG00000256717	NA	NA	NA	NA	NA
Cluster98	Chr11	0.004	ENSG00000255546	ENSG00000255087	ENSG00000272981	ENSG00000272642	ENSG00000273409	NA	NA	NA	NA	NA
Cluster99	Chr11	0	ENSG00000236129	ENSG00000227125	ENSG00000237612	ENSG00000231698	NA	NA	NA	NA	NA	NA
Cluster100	Chr12	0.001	ENSG00000276417	ENSG00000275367	ENSG00000215241	ENSG00000226091	NA	NA	NA	NA	NA	NA
Cluster101	Chr12	0	ENSG00000269514	ENSG00000258234	ENSG00000275228	ENSG00000273765	NA	NA	NA	NA	NA	NA
Cluster102	Chr12	0	ENSG00000260122	ENSG00000260473	ENSG00000261586	ENSG00000259887	NA	NA	NA	NA	NA	NA
Cluster103	Chr12	0	ENSG00000259884	ENSG00000257989	ENSG00000258279	ENSG00000257137	NA	NA	NA	NA	NA	NA
Cluster104	Chr12	0.003	ENSG00000260597	ENSG00000248265	ENSG00000249388	ENSG00000250432	ENSG00000250742	ENSG00000283073	ENSG00000260470	ENSG00000257534	NA	NA
Cluster105	Chr12	0.001	ENSG00000270039	ENSG00000269903	ENSG00000245651	ENSG00000257698	NA	NA	NA	NA	NA	NA
Cluster106	Chr12	0.003	ENSG00000258220	ENSG00000258084	ENSG00000257879	ENSG00000257165	NA	NA	NA	NA	NA	NA
Cluster107	Chr12	0.001	ENSG00000246363	ENSG00000257156	ENSG00000274021	ENSG00000271327	ENSG00000271259	NA	NA	NA	NA	NA
Cluster108	Chr12	0	ENSG00000257519	ENSG00000271579	ENSG00000276308	ENSG00000276972	ENSG00000257726	NA	NA	NA	NA	NA
Cluster109	Chr12	0.001	ENSG00000275898	ENSG00000258249	ENSG00000257883	ENSG00000257654	NA	NA	NA	NA	NA	NA
Cluster110	Chr12	0.002	ENSG00000256750	ENSG00000255618	ENSG00000255814	ENSG00000256149	NA	NA	NA	NA	NA	NA
Cluster111	Chr12	0.001	ENSG00000249267	ENSG00000256276	ENSG00000275212	ENSG00000256342	NA	NA	NA	NA	NA	NA
Cluster112	Chr12	0.001	ENSG00000255944	ENSG00000255998	ENSG00000189238	ENSG00000256128	NA	NA	NA	NA	NA	NA
Cluster113	Chr12	0	ENSG00000261650	ENSG00000214039	ENSG00000256298	ENSG00000256906	NA	NA	NA	NA	NA	NA
Cluster114	Chr13	0.002	ENSG00000177596	ENSG00000226240	ENSG00000281167	ENSG00000236678	NA	NA	NA	NA	NA	NA
Cluster115	Chr13	0	ENSG00000274331	ENSG00000275830	ENSG00000276269	ENSG00000231428	NA	NA	NA	NA	NA	NA
Cluster116	Chr13	0	ENSG00000272695	ENSG00000237699	ENSG00000226921	ENSG00000274766	ENSG00000229373	ENSG00000260910	NA	NA	NA	NA
Cluster117	Chr14	0.001	ENSG00000259130	ENSG00000258918	ENSG00000258772	ENSG00000136315	NA	NA	NA	NA	NA	NA
Cluster118	Chr14	0.003	ENSG00000186960	ENSG00000257056	ENSG00000257748	ENSG00000258038	ENSG00000258028	ENSG00000257523	NA	NA	NA	NA
Cluster119	Chr14	0.001	ENSG00000257826	ENSG00000257585	ENSG00000259104	ENSG00000258844	NA	NA	NA	NA	NA	NA
Cluster120	Chr14	0.002	ENSG00000258955	ENSG00000258479	ENSG00000258942	ENSG00000258808	ENSG00000258537	NA	NA	NA	NA	NA
Cluster121	Chr14	0.002	ENSG00000250548	ENSG00000232774	ENSG00000258777	ENSG00000258667	NA	NA	NA	NA	NA	NA
Cluster122	Chr14	0.003	ENSG00000257759	ENSG00000259115	ENSG00000245466	ENSG00000258689	NA	NA	NA	NA	NA	NA
Cluster123	Chr14	0	ENSG00000269927	ENSG00000259907	ENSG00000258517	ENSG00000269945	NA	NA	NA	NA	NA	NA
Cluster124	Chr14	0.003	ENSG00000259124	ENSG00000258569	ENSG00000258610	ENSG00000258301	NA	NA	NA	NA	NA	NA
Cluster125	Chr14	0.002	ENSG00000258826	ENSG00000258867	ENSG00000258975	ENSG00000259998	ENSG00000258538	NA	NA	NA	NA	NA
Cluster126	Chr14	0.002	ENSG00000258572	ENSG00000258390	ENSG00000258927	ENSG00000270038	NA	NA	NA	NA	NA	NA
Cluster127	Chr14	0.004	ENSG00000214548	ENSG00000258399	ENSG00000225746	ENSG00000258861	ENSG00000223403	ENSG00000230805	ENSG00000259004	NA	NA	NA
Cluster128	Chr14	0.001	ENSG00000258701	ENSG00000258811	ENSG00000258593	ENSG00000259067	NA	NA	NA	NA	NA	NA
Cluster129	Chr15	0	ENSG00000247765	ENSG00000280881	ENSG00000280703	ENSG00000268531	NA	NA	NA	NA	NA	NA
Cluster130	Chr15	0.001	ENSG00000260551	ENSG00000260780	ENSG00000261621	ENSG00000260959	ENSG00000261598	NA	NA	NA	NA	NA
Cluster131	Chr15	0.001	ENSG00000259423	ENSG00000259450	ENSG00000175746	ENSG00000259447	NA	NA	NA	NA	NA	NA
Cluster132	Chr15	0.001	ENSG00000276473	ENSG00000259616	ENSG00000259530	ENSG00000259675	ENSG00000259284	NA	NA	NA	NA	NA
Cluster133	Chr15	0.002	ENSG00000259697	ENSG00000259878	ENSG00000261296	ENSG00000260957	NA	NA	NA	NA	NA	NA
Cluster134	Chr15	0.003	ENSG00000259215	ENSG00000245750	ENSG00000259457	ENSG00000259641	NA	NA	NA	NA	NA	NA
Cluster135	Chr15	0.001	ENSG00000278029	ENSG00000278448	ENSG00000275995	ENSG00000259372	ENSG00000259543	NA	NA	NA	NA	NA
Cluster136	Chr15	0.001	ENSG00000259123	ENSG00000258476	ENSG00000258831	ENSG00000258785	NA	NA	NA	NA	NA	NA
Cluster137	Chr15	0.002	ENSG00000259348	ENSG00000259702	ENSG00000273771	ENSG00000277135	ENSG00000259359	ENSG00000278146	ENSG00000259763	NA	NA	NA
Cluster138	Chr15	0	ENSG00000275322	ENSG00000259275	ENSG00000259542	ENSG00000259312	ENSG00000259534	NA	NA	NA	NA	NA
Cluster139	Chr15	0.005	ENSG00000259664	ENSG00000259582	ENSG00000251209	ENSG00000259870	NA	NA	NA	NA	NA	NA
Cluster140	Chr16	0	ENSG00000255198	ENSG00000277602	ENSG00000261790	ENSG00000260107	NA	NA	NA	NA	NA	NA
Cluster141	Chr16	0.001	ENSG00000260260	ENSG00000261532	ENSG00000259780	ENSG00000260778	NA	NA	NA	NA	NA	NA
Cluster142	Chr16	0	ENSG00000260003	ENSG00000261319	ENSG00000260058	ENSG00000259819	NA	NA	NA	NA	NA	NA
Cluster143	Chr16	0.003	ENSG00000261617	ENSG00000261397	ENSG00000261075	ENSG00000260071	ENSG00000283003	ENSG00000260362	NA	NA	NA	NA
Cluster144	Chr16	0.001	ENSG00000260517	ENSG00000259807	ENSG00000273582	ENSG00000260953	ENSG00000277999	ENSG00000198106	NA	NA	NA	NA
Cluster145	Chr16	0.002	ENSG00000261800	ENSG00000260073	ENSG00000261398	ENSG00000260958	NA	NA	NA	NA	NA	NA
Cluster146	Chr16	0	ENSG00000261703	ENSG00000260042	ENSG00000263082	ENSG00000261241	NA	NA	NA	NA	NA	NA
Cluster147	Chr16	0.001	ENSG00000249231	ENSG00000260963	ENSG00000260393	ENSG00000261261	NA	NA	NA	NA	NA	NA
Cluster148	Chr16	0.001	ENSG00000272250	ENSG00000271009	ENSG00000260880	ENSG00000197445	NA	NA	NA	NA	NA	NA
Cluster149	Chr16	0.001	ENSG00000258582	ENSG00000260687	ENSG00000259971	ENSG00000260848	NA	NA	NA	NA	NA	NA
Cluster150	Chr16	0	ENSG00000261404	ENSG00000261248	ENSG00000275236	ENSG00000260884	ENSG00000261079	NA	NA	NA	NA	NA
Cluster151	Chr16	0.003	ENSG00000277214	ENSG00000278058	ENSG00000275040	ENSG00000260876	NA	NA	NA	NA	NA	NA
Cluster152	Chr16	0.001	ENSG00000268078	ENSG00000268505	ENSG00000269186	ENSG00000270058	ENSG00000268754	ENSG00000268532	ENSG00000168367	ENSG00000269826	NA	NA
Cluster153	Chr16	0.002	ENSG00000260387	ENSG00000261161	ENSG00000274478	ENSG00000260026	ENSG00000261175	NA	NA	NA	NA	NA
Cluster154	Chr16	0.001	ENSG00000260162	ENSG00000261327	ENSG00000261816	ENSG00000260420	ENSG00000261273	NA	NA	NA	NA	NA
Cluster155	Chr17	0.002	ENSG00000266824	ENSG00000178977	ENSG00000269947	ENSG00000266279	NA	NA	NA	NA	NA	NA
Cluster156	Chr17	0.004	ENSG00000262786	ENSG00000266709	ENSG00000266378	ENSG00000230647	NA	NA	NA	NA	NA	NA
Cluster157	Chr17	0.002	ENSG00000233193	ENSG00000265519	ENSG00000276855	ENSG00000237057	NA	NA	NA	NA	NA	NA
Cluster158	Chr17	0	ENSG00000230197	ENSG00000263394	ENSG00000262202	ENSG00000262292	ENSG00000266311	ENSG00000236022	ENSG00000281856	NA	NA	NA
Cluster159	Chr17	0.001	ENSG00000266925	ENSG00000260907	ENSG00000267075	ENSG00000264422	ENSG00000227685	NA	NA	NA	NA	NA
Cluster160	Chr17	0	ENSG00000267644	ENSG00000267259	ENSG00000266830	ENSG00000264486	ENSG00000260777	NA	NA	NA	NA	NA
Cluster161	Chr17	0	ENSG00000274341	ENSG00000278668	ENSG00000266385	ENSG00000264083	NA	NA	NA	NA	NA	NA
Cluster162	Chr17	0	ENSG00000249383	ENSG00000249982	ENSG00000249658	ENSG00000225860	NA	NA	NA	NA	NA	NA
Cluster163	Chr17	0	ENSG00000265055	ENSG00000278730	ENSG00000274561	ENSG00000277476	ENSG00000278740	ENSG00000267731	ENSG00000274712	NA	NA	NA
Cluster164	Chr17	0.004	ENSG00000267653	ENSG00000267194	ENSG00000227517	ENSG00000237560	NA	NA	NA	NA	NA	NA
Cluster165	Chr17	0.001	ENSG00000263574	ENSG00000177338	ENSG00000234721	ENSG00000265927	ENSG00000266765	NA	NA	NA	NA	NA
Cluster166	Chr17	0.001	ENSG00000283914	ENSG00000204277	ENSG00000267737	ENSG00000266970	NA	NA	NA	NA	NA	NA
Cluster167	Chr17	0.001	ENSG00000185168	ENSG00000275542	ENSG00000275966	ENSG00000263154	ENSG00000262223	ENSG00000274833	ENSG00000262877	NA	NA	NA
Cluster168	Chr17	0.001	ENSG00000274370	ENSG00000261888	ENSG00000262898	ENSG00000262952	ENSG00000262094	NA	NA	NA	NA	NA
Cluster169	Chr18	0.001	ENSG00000267051	ENSG00000273119	ENSG00000267564	ENSG00000267425	ENSG00000267252	NA	NA	NA	NA	NA
Cluster170	Chr18	0.001	ENSG00000265786	ENSG00000263618	ENSG00000266554	ENSG00000264301	ENSG00000263821	NA	NA	NA	NA	NA
Cluster171	Chr18	0.004	ENSG00000265485	ENSG00000263553	ENSG00000266573	ENSG00000264345	NA	NA	NA	NA	NA	NA
Cluster172	Chr18	0	ENSG00000267057	ENSG00000267399	ENSG00000267712	ENSG00000267732	NA	NA	NA	NA	NA	NA
Cluster173	Chr18	0	ENSG00000266743	ENSG00000264260	ENSG00000264595	ENSG00000266014	ENSG00000265717	ENSG00000264212	ENSG00000266614	NA	NA	NA
Cluster174	Chr18	0.002	ENSG00000275763	ENSG00000263812	ENSG00000266256	ENSG00000266312	ENSG00000276397	NA	NA	NA	NA	NA
Cluster175	Chr19	0.003	ENSG00000267723	ENSG00000267406	ENSG00000266913	ENSG00000267147	NA	NA	NA	NA	NA	NA
Cluster176	Chr19	0.002	ENSG00000261558	ENSG00000261615	ENSG00000269543	ENSG00000267886	NA	NA	NA	NA	NA	NA
Cluster177	Chr19	0.003	ENSG00000267696	ENSG00000261824	ENSG00000261770	ENSG00000267575	NA	NA	NA	NA	NA	NA
Cluster178	Chr19	0.004	ENSG00000266928	ENSG00000267320	ENSG00000267238	ENSG00000260725	ENSG00000267243	ENSG00000266893	NA	NA	NA	NA
Cluster179	Chr19	0	ENSG00000267683	ENSG00000267027	ENSG00000267240	ENSG00000267339	ENSG00000267014	NA	NA	NA	NA	NA
Cluster180	Chr19	0.001	ENSG00000274104	ENSG00000267767	ENSG00000261754	ENSG00000269086	ENSG00000271109	ENSG00000271649	ENSG00000270544	ENSG00000271171	ENSG00000269037	ENSG00000270876
Cluster181	Chr19	0	ENSG00000267107	ENSG00000268355	ENSG00000270164	ENSG00000268027	NA	NA	NA	NA	NA	NA
Cluster182	Chr19	0.001	ENSG00000268307	ENSG00000232098	ENSG00000268912	ENSG00000269473	NA	NA	NA	NA	NA	NA
Cluster183	Chr20	0	ENSG00000277087	ENSG00000276768	ENSG00000278816	ENSG00000277425	NA	NA	NA	NA	NA	NA
Cluster184	Chr20	0.001	ENSG00000276688	ENSG00000226995	ENSG00000230563	ENSG00000205181	ENSG00000266908	ENSG00000225640	NA	NA	NA	NA
Cluster185	Chr20	0.001	ENSG00000232271	ENSG00000228888	ENSG00000238102	ENSG00000261249	ENSG00000224711	NA	NA	NA	NA	NA
Cluster186	Chr20	0.004	ENSG00000278041	ENSG00000233492	ENSG00000279082	ENSG00000280350	NA	NA	NA	NA	NA	NA
Cluster187	Chr20	0.001	ENSG00000228265	ENSG00000276073	ENSG00000275784	ENSG00000228386	NA	NA	NA	NA	NA	NA
Cluster188	Chr20	0.001	ENSG00000260032	ENSG00000277235	ENSG00000234139	ENSG00000237063	NA	NA	NA	NA	NA	NA
Cluster189	Chr20	0	ENSG00000234967	ENSG00000228503	ENSG00000237423	ENSG00000229522	NA	NA	NA	NA	NA	NA
Cluster190	Chr20	0.002	ENSG00000272050	ENSG00000260542	ENSG00000264490	ENSG00000273812	NA	NA	NA	NA	NA	NA
Cluster191	Chr20	0.005	ENSG00000272259	ENSG00000125514	ENSG00000237119	ENSG00000231133	ENSG00000225978	ENSG00000260416	ENSG00000231977	ENSG00000273821	NA	NA
Cluster192	Chr21	0	ENSG00000280018	ENSG00000279313	ENSG00000278884	ENSG00000277067	NA	NA	NA	NA	NA	NA
Cluster193	Chr21	0.003	ENSG00000234730	ENSG00000237527	ENSG00000238265	ENSG00000233997	NA	NA	NA	NA	NA	NA
Cluster194	Chr21	0.001	ENSG00000232837	ENSG00000235888	ENSG00000237721	ENSG00000237609	NA	NA	NA	NA	NA	NA
Cluster195	Chr21	0	ENSG00000225331	ENSG00000237604	ENSG00000232698	ENSG00000278158	ENSG00000275799	NA	NA	NA	NA	NA
Cluster196	Chr21	0.002	ENSG00000183250	ENSG00000276529	ENSG00000234880	ENSG00000261706	ENSG00000275874	NA	NA	NA	NA	NA
Cluster197	Chr21	0.001	ENSG00000182586	ENSG00000223768	ENSG00000184274	ENSG00000229382	ENSG00000237664	NA	NA	NA	NA	NA
Cluster198	Chr22	0.002	ENSG00000234928	ENSG00000178248	ENSG00000225413	ENSG00000280623	ENSG00000272733	NA	NA	NA	NA	NA
Cluster199	Chr22	0	ENSG00000273145	ENSG00000197182	ENSG00000231010	ENSG00000235159	NA	NA	NA	NA	NA	NA
Cluster200	Chr22	0.002	ENSG00000205634	ENSG00000224271	ENSG00000230345	ENSG00000279712	NA	NA	NA	NA	NA	NA
Cluster201	Chr22	0	ENSG00000280224	ENSG00000279597	ENSG00000212939	ENSG00000213279	NA	NA	NA	NA	NA	NA
Cluster202	Chr22	0.003	ENSG00000260613	ENSG00000279494	ENSG00000273192	ENSG00000278869	NA	NA	NA	NA	NA	NA

## Sheet: Additional Table S3
Additional Table S3:Bed file of lincRNA clusters co-expressed in only one cancer
Chromosome.scaffold.name	Gene.start..bp.	Gene.end..bp.	Gene.stable.ID	cluster
1	58838448	58851254	ENSG00000231740	Cluster7
1	58882868	58903747	ENSG00000232453	Cluster7
1	58933643	59240555	ENSG00000237352	Cluster7
1	58812808	58813342	ENSG00000272226	Cluster7
3	148078159	148088029	ENSG00000241131	Cluster32
3	148093175	148127233	ENSG00000241792	Cluster32
3	148280891	148399956	ENSG00000242440	Cluster32
3	148195729	148280098	ENSG00000243347	Cluster32
3	148160911	148226606	ENSG00000244650	Cluster32
7	70972	95683	ENSG00000232325	Cluster64
7	174920	176013	ENSG00000239715	Cluster64
7	149597	155465	ENSG00000240859	Cluster64
7	135853	149466	ENSG00000242474	Cluster64
7	77038	81178	ENSG00000242611	Cluster64
7	161765	164972	ENSG00000261795	Cluster64
7	12704	27234	ENSG00000283061	Cluster64
9	61854162	61855331	ENSG00000154537	Cluster80
9	61868727	61887084	ENSG00000223379	Cluster80
9	61898805	61911022	ENSG00000229697	Cluster80
9	61865755	61866965	ENSG00000235659	Cluster80
10	6737382	6739026	ENSG00000223784	Cluster82
10	6891457	6920472	ENSG00000234248	Cluster82
10	6779598	6842906	ENSG00000238266	Cluster82
10	6774307	6779180	ENSG00000281186	Cluster82
11	45771432	45772358	ENSG00000205106	Cluster89
11	45750823	45751871	ENSG00000255226	Cluster89
11	45733994	45735766	ENSG00000255426	Cluster89
11	45813219	45825258	ENSG00000255447	Cluster89
16	52552090	52652105	ENSG00000249231	Cluster147
16	52607762	52608158	ENSG00000260393	Cluster147
16	52607349	52613908	ENSG00000260963	Cluster147
16	52622115	52631088	ENSG00000261261	Cluster147
17	32430967	32432841	ENSG00000264083	Cluster161
17	32411217	32412420	ENSG00000266385	Cluster161
17	32408013	32408309	ENSG00000274341	Cluster161
17	32410159	32410746	ENSG00000278668	Cluster161
17	68096046	68101474	ENSG00000265055	Cluster163
17	68189884	68192802	ENSG00000267731	Cluster163
17	68131462	68131907	ENSG00000274561	Cluster163
17	68205489	68207493	ENSG00000274712	Cluster163
17	68133201	68135935	ENSG00000277476	Cluster163
17	68126666	68129586	ENSG00000278730	Cluster163
17	68188547	68189165	ENSG00000278740	Cluster163
17	69577251	69903000	ENSG00000227517	Cluster164
17	69961707	69983538	ENSG00000237560	Cluster164
17	69551358	69553861	ENSG00000267194	Cluster164
17	69477139	69501755	ENSG00000267653	Cluster164
17	73750330	73828520	ENSG00000177338	Cluster165
17	73786802	73800793	ENSG00000234721	Cluster165
17	73737854	73756557	ENSG00000263574	Cluster165
17	73831572	73836019	ENSG00000265927	Cluster165
17	73894749	73911878	ENSG00000266765	Cluster165
17	81303771	81309248	ENSG00000185168	Cluster167
17	81376001	81385360	ENSG00000262223	Cluster167
17	81388126	81390256	ENSG00000262877	Cluster167
17	81362272	81374214	ENSG00000263154	Cluster167
17	81387415	81387766	ENSG00000274833	Cluster167
17	81339183	81339691	ENSG00000275542	Cluster167
17	81345476	81345966	ENSG00000275966	Cluster167
22	49548681	49556473	ENSG00000212939	Cluster201
22	49572264	49575426	ENSG00000213279	Cluster201
22	49534062	49534926	ENSG00000279597	Cluster201
22	49500568	49501585	ENSG00000280224	Cluster201

## Sheet: Additional Table S4
Additional Table S4:Univariate Cox proportional hazard regression analysis of genes that are significantly related to survival in different cancers
Variable	HR	low95	up95	P-value
BLCA
Cluster124
ENSG00000259124	0.776331	0.529386	1.13847	0.194378
ENSG00000258569	0.916749	0.62512	1.34443	0.656306
ENSG00000258301	1.12256	0.765394	1.64639	0.551645
Cluster124	0.638	0.435	0.937	0.0218
Cluster130
ENSG00000260551	1.4977	0.968679	2.31564	0.0981331
ENSG00000260780	1.02187	0.610271	1.71106	0.934835
ENSG00000261621	1.63569	1.05337	2.53991	0.0544068
ENSG00000260959	Inf	Inf	Inf	0.0911372
ENSG00000261598	1.40617	0.774619	2.55262	0.324342
Cluster130	0.187	0.0592	0.59	0.00422
Cluster134
ENSG00000259215	1.04743	0.714216	1.5361	0.811991
ENSG00000245750	1.08036	0.736625	1.5845	0.692674
ENSG00000259457	0.954234	0.65077	1.39921	0.809925
ENSG00000259641	1.30058	0.885964	1.90922	0.17636
Cluster134	0.518	0.317	0.845	0.00849
Cluster144
ENSG00000260517	0.839894	0.57291	1.23129	0.371788
ENSG00000259807	0.749063	0.510918	1.09821	0.140257
ENSG00000260953	0.697984	0.476063	1.02336	0.0684211
ENSG00000198106	0.750641	0.511994	1.10052	0.142371
Cluster144	0.61	0.391	0.95	0.0287
Cluster145
ENSG00000261800	0.72859	0.39369	1.34838	0.252837
ENSG00000260073	0.741676	0.433174	1.26989	0.226316
ENSG00000261398	0.551346	0.238011	1.27718	0.0683208
ENSG00000260958	0.830097	0.520934	1.32274	0.408432
Cluster145	0.408	0.252	0.66	0.000261
Cluster150
ENSG00000261404	1.37865	0.938826	2.02452	0.0971841
ENSG00000261248	0.900119	0.608518	1.33146	0.592791
ENSG00000260884	1.2945	0.88269	1.89842	0.184631
ENSG00000261079	0.935702	0.638126	1.37205	0.73363
Cluster150	0.538	0.356	0.811	0.0031
Cluster166
ENSG00000204277	0.973563	0.664023	1.4274	0.890733
ENSG00000267737	1.01761	0.69409	1.49192	0.92868
ENSG00000266970	1.19615	0.814921	1.75572	0.357116
Cluster166	0.634	0.423	0.951	0.0278
Cluster167
ENSG00000185168	1.19573	0.815554	1.75313	0.359459
ENSG00000263154	0.717234	0.481346	1.06872	0.087687
ENSG00000262223	0.735604	0.50105	1.07996	0.113629
ENSG00000262877	1.16768	0.79583	1.71327	0.429647
Cluster167	0.49	0.33	0.728	0.000407
Cluster173
ENSG00000266743	1.06942	0.683624	1.67293	0.772266
ENSG00000264260	2.42718	1.12721	5.22638	0.116992
ENSG00000264595	0.946231	0.511963	1.74887	0.856627
ENSG00000266014	0.828879	0.476058	1.44319	0.477348
ENSG00000265717	1.16881	0.754577	1.81045	0.500996
ENSG00000264212	1.53035	0.879996	2.66133	0.195168
Cluster173	0.533	0.313	0.909	0.0209
Cluster180
ENSG00000267767	1.14121	0.778215	1.67351	0.499481
ENSG00000261754	1.06964	0.728913	1.56964	0.730417
ENSG00000269086	1.16271	0.792749	1.70534	0.440579
ENSG00000271109	1.22721	0.837032	1.79928	0.295237
ENSG00000271649	1.17631	0.599726	2.30724	0.657625
ENSG00000270544	1.62194	0.896456	2.93453	0.183189
ENSG00000271171	2.19129	0.982653	4.88651	0.168495
ENSG00000269037	1.59603	1.01699	2.50477	0.0741209
ENSG00000270876	1.29009	0.879918	1.89147	0.192725
Cluster180	0.49	0.308	0.779	0.00256
Cluster181
ENSG00000267107	0.726709	0.49519	1.06647	0.101065
ENSG00000268355	0.683553	0.465881	1.00293	0.0508667
ENSG00000270164	1.33582	0.91013	1.9606	0.136755
ENSG00000268027	1.06316	0.725147	1.55874	0.753069
Cluster181	0.649	0.441	0.955	0.0281
Cluster185
ENSG00000232271	1.39946	0.807373	2.42575	0.288201
ENSG00000228888	1.51619	0.825028	2.78637	0.25335
ENSG00000238102	1.90194	0.450501	8.02963	0.514469
ENSG00000261249	1.43464	0.441748	4.65918	0.61047
ENSG00000224711	3.07401	0.977804	9.66404	0.238359
Cluster185	0.43	0.188	0.984	0.0456
Cluster188
ENSG00000260032	0.942444	0.642822	1.38172	0.76086
ENSG00000234139	0.778447	0.530649	1.14196	0.195848
ENSG00000237063	1.38401	0.943991	2.02914	0.098168
Cluster188	0.611	0.405	0.92	0.0184
Cluster191
ENSG00000272259	0.882802	0.537053	1.45114	0.608283
ENSG00000125514	1.07475	0.553661	2.08628	0.83566
ENSG00000237119	1.55829	0.688067	3.52914	0.378707
ENSG00000231133	0.778462	0.53066	1.14198	0.198463
ENSG00000225978	0.705281	0.480857	1.03445	0.0734356
ENSG00000260416	1.08027	0.634623	1.83887	0.781518
ENSG00000231977	0.737461	0.503027	1.08115	0.121626
Cluster191	0.549	0.372	0.808	0.00239
Cluster195
ENSG00000225331	0.716074	0.4884	1.04988	0.0882415
ENSG00000237604	1.0897	0.742915	1.59835	0.659315
ENSG00000232698	1.29316	0.881787	1.89645	0.186666
Cluster195	0.64	0.436	0.94	0.0229
Cluster22
ENSG00000259439	1.46249	0.997193	2.14491	0.0521577
ENSG00000236502	1.06961	0.729522	1.56823	0.729718
ENSG00000225156	1.39042	0.94814	2.039	0.0911494
ENSG00000231156	0.993576	0.677106	1.45796	0.973633
Cluster22	0.44	0.258	0.749	0.00252
Cluster29
ENSG00000224342	0.979607	0.658671	1.45692	0.918376
ENSG00000234902	1.36095	0.928315	1.99521	0.116111
ENSG00000225916	1.15586	0.788276	1.69485	0.459242
ENSG00000240440	1.12969	0.770496	1.65634	0.532828
ENSG00000229647	0.873757	0.595964	1.28103	0.488994
ENSG00000225064	0.648774	0.39259	1.07213	0.0532883
Cluster29	0.632	0.407	0.98	0.0405
Cluster49
ENSG00000248539	0.707328	0.320366	1.56169	0.31697
ENSG00000250032	2.15024	0.810922	5.70159	0.270118
ENSG00000251518	1.43692	0.795456	2.59566	0.294146
ENSG00000248533	2.97564	1.28242	6.90447	0.108126
ENSG00000250003	1.24158	0.351622	4.38402	0.760952
ENSG00000248461	1.09168	0.597029	1.99618	0.782493
Cluster49	0.287	0.091	0.905	0.0332
Cluster54
ENSG00000212930	0.934582	0.399771	2.18486	0.871939
ENSG00000251093	0.770731	0.442292	1.34306	0.312291
ENSG00000234292	0.801495	0.546715	1.17501	0.25719
ENSG00000248323	0.809779	0.55221	1.18749	0.278652
ENSG00000271762	0.800118	0.545353	1.1739	0.251356
Cluster54	0.544	0.363	0.816	0.00322
Cluster61
ENSG00000236700	0.791125	0.53963	1.15983	0.230871
ENSG00000232310	0.73327	0.499722	1.07597	0.110761
ENSG00000229722	0.726234	0.317194	1.66276	0.381253
ENSG00000227723	1.19386	0.632216	2.25447	0.609576
Cluster61	0.6	0.4	0.899	0.0132
Cluster71
ENSG00000254260	2.82421	1.37636	5.7951	0.0628857
ENSG00000254092	0.652212	0.361194	1.17771	0.0950008
ENSG00000253147	1.00135	0.595914	1.68264	0.995909
ENSG00000254026	1.02706	0.57796	1.82513	0.92796
ENSG00000253199	1.2765	0.639494	2.54803	0.529244
ENSG00000254040	1.26577	0.68014	2.35567	0.497215
Cluster71	0.572	0.33	0.99	0.0459
Cluster76
ENSG00000248599	0.81239	0.55398	1.19134	0.289863
ENSG00000253395	0.701325	0.478286	1.02837	0.0701116
ENSG00000253737	1.17908	0.802981	1.73135	0.395789
ENSG00000261087	0.906472	0.618165	1.32924	0.613701
ENSG00000271882	0.933442	0.636646	1.3686	0.723612
ENSG00000253679	0.997682	0.67613	1.47216	0.99065
ENSG00000253282	0.899946	0.586033	1.38201	0.62074
Cluster76	0.546	0.361	0.828	0.00438
Cluster83
ENSG00000204187	1.25567	0.856117	1.84169	0.247452
ENSG00000226808	1.10777	0.755458	1.62437	0.600456
ENSG00000236769	1.3178	0.765855	2.26752	0.366033
ENSG00000227029	1.35467	0.852996	2.15138	0.238335
ENSG00000233395	0.965805	0.300621	3.10285	0.952575
Cluster83	0.503	0.262	0.967	0.0392
Cluster84
ENSG00000237579	0.898918	0.480308	1.68237	0.727328
ENSG00000229649	1.59008	1.04601	2.41714	0.0502179
ENSG00000225208	1.36735	0.92297	2.02569	0.13463
ENSG00000230967	1.6722	0.676541	4.13314	0.373639
Cluster84	0.643	0.419	0.987	0.0434
BRCA
Cluster113
ENSG00000261650	0.90701	0.540712	1.52145	0.701199
ENSG00000214039	0.911262	0.638625	1.30029	0.605448
ENSG00000256298	0.76109	0.409372	1.41499	0.333566
ENSG00000256906	0.725128	0.504389	1.04247	0.0718018
Cluster113	0.629	0.441	0.897	0.0104
Cluster117
ENSG00000259130	0.718546	0.506041	1.02029	0.0658099
ENSG00000258918	0.75017	0.511095	1.10108	0.120638
ENSG00000258772	0.643475	0.294217	1.40733	0.176399
ENSG00000136315	0.924551	0.651123	1.3128	0.658974
Cluster117	0.665	0.466	0.949	0.0244
Cluster121
ENSG00000250548	1.12163	0.789877	1.59272	0.519484
ENSG00000258777	1.20053	0.845485	1.70468	0.306978
ENSG00000258667	0.935736	0.658927	1.32883	0.710083
Cluster121	0.591	0.385	0.907	0.016
Cluster154
ENSG00000260162	1.3255	0.932004	1.88512	0.122636
ENSG00000261327	1.41929	0.997956	2.01851	0.0567014
ENSG00000261816	0.892826	0.608081	1.31091	0.551617
ENSG00000260420	0.843005	0.593565	1.19727	0.341098
ENSG00000261273	1.44682	1.01101	2.0705	0.0535379
Cluster154	0.538	0.356	0.811	0.00312
Cluster158
ENSG00000230197	0.962418	0.677704	1.36674	0.829451
ENSG00000263394	0.741449	0.521914	1.05333	0.0981104
ENSG00000262202	1.25403	0.882899	1.78116	0.205273
ENSG00000262292	1.01608	0.715452	1.44302	0.928519
ENSG00000266311	0.724903	0.502591	1.04555	0.0716081
ENSG00000236022	0.994033	0.700042	1.41149	0.97328
Cluster158	0.531	0.363	0.776	0.00108
Cluster171
ENSG00000265485	0.854447	0.601742	1.21328	0.37765
ENSG00000263553	0.876249	0.45568	1.68498	0.674612
ENSG00000266573	0.757484	0.533465	1.07558	0.11926
ENSG00000264345	0.762351	0.536653	1.08297	0.132501
Cluster171	0.549	0.384	0.783	0.000954
Cluster175
ENSG00000267723	1.25062	0.880284	1.77677	0.209526
ENSG00000267406	0.99371	0.699662	1.41134	0.971742
ENSG00000266913	0.872313	0.614194	1.23891	0.445947
ENSG00000267147	1.25037	0.880497	1.77561	0.210946
Cluster175	0.579	0.375	0.894	0.0137
Cluster178
ENSG00000266928	1.91307	0.911676	4.01439	0.193312
ENSG00000267320	0.698115	0.394162	1.23646	0.154564
ENSG00000267238	0.523586	0.200543	1.367	0.0692858
ENSG00000260725	0.97457	0.647676	1.46645	0.900626
ENSG00000267243	0.788781	0.549152	1.13297	0.186771
ENSG00000266893	0.605073	0.289843	1.26314	0.0938519
Cluster178	0.428	0.289	0.636	2.56e-05
Cluster200
ENSG00000205634	1.03194	0.725752	1.46731	0.860972
ENSG00000224271	1.37374	0.965952	1.95367	0.0836423
ENSG00000230345	1.01656	0.713286	1.44879	0.927523
Cluster200	0.465	0.266	0.811	0.00696
Cluster21
ENSG00000224739	0.924205	0.649797	1.3145	0.661617
ENSG00000231826	0.728828	0.51247	1.03653	0.0846638
ENSG00000233978	0.745921	0.456881	1.21782	0.191646
ENSG00000230587	0.787622	0.553361	1.12106	0.19049
Cluster21	0.562	0.394	0.801	0.00144
Cluster36
ENSG00000225742	1.08808	0.766249	1.5451	0.635285
ENSG00000238097	0.843066	0.592492	1.19961	0.335787
ENSG00000228271	0.83662	0.588963	1.18842	0.319027
ENSG00000214145	1.07748	0.75803	1.53156	0.674398
Cluster36	0.663	0.464	0.947	0.0241
Cluster47
ENSG00000249807	1.2296	0.845314	1.78858	0.297849
ENSG00000260515	0.99868	0.703139	1.41844	0.9941
ENSG00000271998	0.965255	0.67973	1.37072	0.843109
ENSG00000272417	1.29018	0.908131	1.83294	0.151543
Cluster47	0.526	0.315	0.878	0.0139
Cluster55
ENSG00000272255	1.37344	0.966761	1.95121	0.0762195
ENSG00000250635	1.35809	0.956031	1.92923	0.0900576
ENSG00000249526	1.32048	0.929804	1.87529	0.124051
ENSG00000249131	1.12362	0.731035	1.72703	0.60685
ENSG00000251387	0.794174	0.557404	1.13152	0.195847
ENSG00000271792	0.780576	0.350977	1.73601	0.495316
Cluster55	0.612	0.409	0.915	0.0167
Cluster93
ENSG00000245532	1.30355	0.917967	1.85109	0.141354
ENSG00000251562	0.823674	0.580023	1.16967	0.280294
ENSG00000270117	0.730896	0.51455	1.03821	0.083282
Cluster93	0.693	0.488	0.986	0.0412
CESC
Cluster123
ENSG00000269927	1.00566	0.545155	1.85518	0.985486
ENSG00000259907	1.83555	0.983257	3.4266	0.0799846
ENSG00000258517	0.711535	0.324365	1.56084	0.345597
ENSG00000269945	1.75256	0.926659	3.31458	0.115932
Cluster123	0.389	0.186	0.817	0.0126
Cluster127
ENSG00000214548	0.974274	0.527988	1.79779	0.933102
ENSG00000258399	0.794475	0.430505	1.46616	0.460919
ENSG00000225746	0.882548	0.478272	1.62855	0.6887
ENSG00000258861	0.320878	0.0102377	10.0571	0.234489
ENSG00000223403	0.593272	0.321508	1.09475	0.0983993
ENSG00000230805	0.56568	0.192436	1.66286	0.188623
ENSG00000259004	1.52166	0.823064	2.81322	0.177394
Cluster127	0.432	0.225	0.831	0.0119
Cluster149
ENSG00000258582	0.345606	0.0515033	2.31914	0.0614209
ENSG00000260687	0.222847	0.00360638	13.7703	0.102526
ENSG00000259971	Inf	Inf	Inf	0.785374
ENSG00000260848	0.538826	0.19411	1.49571	0.128878
Cluster149	0.398	0.198	0.8	0.00964
Cluster156
ENSG00000262786	0.694788	0.314862	1.53315	0.312066
ENSG00000266709	1.03465	0.559548	1.91315	0.913115
ENSG00000266378	1.27728	0.687933	2.37151	0.427474
ENSG00000230647	1.01186	0.543943	1.88228	0.970265
Cluster156	0.36	0.166	0.78	0.00967
Cluster18
ENSG00000260476	0.918783	0.497983	1.69516	0.785472
ENSG00000260077	1.55682	0.841532	2.8801	0.155032
ENSG00000272524	1.0078	0.54632	1.85909	0.980154
Cluster18	0.442	0.211	0.927	0.0307
Cluster184
ENSG00000226995	1.63266	0.857519	3.10847	0.165154
ENSG00000230563	0.721858	0.390402	1.33473	0.293024
ENSG00000205181	0.843716	0.456917	1.55796	0.584564
ENSG00000266908	0.812242	0.439736	1.5003	0.510051
ENSG00000225640	2.15436	0.7748	5.99029	0.276586
Cluster184	0.437	0.213	0.894	0.0235
Cluster189
ENSG00000234967	1.75066	0.685809	4.4689	0.34016
ENSG00000228503	0.743907	0.331197	1.6709	0.428474
ENSG00000237423	0.838377	0.450917	1.55877	0.571304
ENSG00000229522	1.81476	0.793985	4.14787	0.249432
Cluster189	0.307	0.0947	0.996	0.0492
Cluster194
ENSG00000232837	0.648974	0.351643	1.19771	0.168506
ENSG00000235888	0.989296	0.535602	1.8273	0.9723
ENSG00000237721	1.02432	0.555122	1.89009	0.938146
ENSG00000237609	0.623049	0.337641	1.14971	0.139225
Cluster194	0.395	0.209	0.746	0.00421
Cluster3
ENSG00000237491	1.15616	0.626828	2.1325	0.642403
ENSG00000177757	0.792098	0.429035	1.4624	0.458786
ENSG00000225880	1.16368	0.630479	2.1478	0.627131
ENSG00000230368	1.72902	0.934466	3.19918	0.0760017
ENSG00000272438	0.934576	0.506678	1.72384	0.828349
ENSG00000230699	0.694084	0.376294	1.28025	0.24634
ENSG00000241180	0.936906	0.507945	1.72813	0.83445
ENSG00000223764	1.11455	0.603404	2.05869	0.729559
Cluster3	0.37	0.188	0.73	0.0041
Cluster34
ENSG00000272970	1.43444	0.777686	2.64583	0.250528
ENSG00000273403	0.98738	0.535165	1.82172	0.967432
ENSG00000272922	1.28346	0.69584	2.36729	0.425349
ENSG00000229433	1.95998	1.03396	3.71533	0.0669755
Cluster34	0.405	0.187	0.878	0.0221
Cluster45
ENSG00000248677	1.28681	0.697655	2.37348	0.419574
ENSG00000251365	1.06102	0.575242	1.95704	0.84908
ENSG00000272071	1.46192	0.792526	2.69672	0.226511
ENSG00000249734	1.21449	0.634795	2.32356	0.569862
ENSG00000250060	1.5777	0.662581	3.75672	0.381739
ENSG00000250974	2.23017	0.945685	5.25934	0.16712
Cluster45	0.37	0.17	0.804	0.0121
Cluster60
ENSG00000272541	1.1726	0.635149	2.16485	0.609211
ENSG00000271761	1.09102	0.591445	2.01258	0.779607
ENSG00000272316	0.923863	0.50071	1.70463	0.79975
ENSG00000225096	0.77403	0.416669	1.43789	0.409294
Cluster60	0.395	0.175	0.892	0.0253
Cluster67
ENSG00000233559	0.940427	0.509858	1.73461	0.843576
ENSG00000226380	0.701967	0.380578	1.29476	0.260919
ENSG00000271204	0.82406	0.446683	1.52026	0.537381
ENSG00000273319	0.767853	0.416289	1.41632	0.399097
Cluster67	0.442	0.239	0.818	0.0093
Cluster70
ENSG00000253252	0.932636	0.356868	2.43735	0.883466
ENSG00000248538	0.618183	0.33373	1.14509	0.116629
ENSG00000254235	1.88577	1.01177	3.51477	0.0655236
Cluster70	0.415	0.183	0.937	0.0344
Cluster79
ENSG00000218839	0.457123	0.107768	1.93899	0.126376
ENSG00000227917	1.72047	0.929986	3.18287	0.0825849
ENSG00000231808	0.745647	0.395333	1.40638	0.348334
Cluster79	0.408	0.181	0.92	0.0308
Cluster8
ENSG00000273264	0.93061	0.503979	1.71839	0.816612
ENSG00000272691	1.62112	0.877626	2.99448	0.122824
ENSG00000230285	0.908628	0.485329	1.70113	0.762146
Cluster8	0.466	0.228	0.952	0.0362
Cluster84
ENSG00000237579	0.884938	0.357957	2.18774	0.781206
ENSG00000229649	0.667304	0.336971	1.32147	0.208351
ENSG00000225208	0.457161	0.153454	1.36195	0.0516621
ENSG00000230967	1.1075	0.167228	7.33457	0.919307
Cluster84	0.395	0.206	0.758	0.00525
Cluster9
ENSG00000234283	1.03903	0.563321	1.91648	0.902372
ENSG00000238107	0.840791	0.455304	1.55266	0.577135
ENSG00000224481	0.749017	0.40532	1.38416	0.363788
ENSG00000272824	1.20527	0.653372	2.22336	0.549374
Cluster9	0.458	0.245	0.854	0.0141
COAD
Cluster1
ENSG00000243485	0.916234	0.262355	3.1998	0.882705
ENSG00000237613	1.27325	0.530904	3.0536	0.602739
ENSG00000238009	0.731506	0.328618	1.62834	0.447636
ENSG00000239945	0.529475	0.237501	1.18039	0.122505
Cluster1	0.262	0.105	0.657	0.00429
GBM
Cluster106
ENSG00000258220	0.897292	0.350186	2.29916	0.811049
ENSG00000258084	1.23186	0.862457	1.75949	0.250442
ENSG00000257879	1.28271	0.463148	3.55251	0.667666
ENSG00000257165	1.43964	0.548344	3.77967	0.528744
Cluster106	0.631	0.426	0.935	0.0216
Cluster119
ENSG00000257826	1.39951	0.977398	2.00392	0.0593798
ENSG00000257585	1.16862	0.818196	1.66911	0.38391
ENSG00000259104	1.03472	0.725278	1.4762	0.849201
ENSG00000258844	1.20611	0.843379	1.72484	0.294965
Cluster119	0.667	0.456	0.976	0.037
Cluster122
ENSG00000257759	1.35857	0.95245	1.93785	0.0879518
ENSG00000259115	0.98258	0.66701	1.44745	0.928271
ENSG00000245466	0.975227	0.683627	1.39121	0.888412
ENSG00000258689	1.01666	0.712513	1.45064	0.926841
Cluster122	0.52	0.351	0.772	0.00116
Cluster126
ENSG00000258390	1.20157	0.841336	1.71604	0.293022
ENSG00000258927	0.849207	0.589052	1.22426	0.356716
ENSG00000270038	1.03944	0.680972	1.58662	0.857476
Cluster126	0.666	0.454	0.978	0.038
Cluster128
ENSG00000258701	0.70868	0.49596	1.01264	0.0506519
ENSG00000258811	0.839154	0.58814	1.1973	0.325055
ENSG00000258593	1.05387	0.726085	1.52963	0.781497
ENSG00000259067	0.876648	0.58739	1.30835	0.504103
Cluster128	0.644	0.445	0.93	0.0191
Cluster134
ENSG00000259215	0.880807	0.617561	1.25627	0.477935
ENSG00000245750	0.836459	0.585735	1.1945	0.317605
ENSG00000259457	1.06487	0.746737	1.51853	0.726472
ENSG00000259641	1.29169	0.903793	1.84606	0.146952
Cluster134	0.604	0.41	0.889	0.0106
Cluster154
ENSG00000260162	0.776253	0.543172	1.10935	0.156391
ENSG00000261327	0.786969	0.550455	1.1251	0.180995
ENSG00000261816	0.815745	0.571759	1.16385	0.252668
ENSG00000260420	0.817196	0.57233	1.16683	0.256513
ENSG00000261273	0.824156	0.556679	1.22015	0.302863
Cluster154	0.612	0.423	0.885	0.00909
Cluster166
ENSG00000204277	1.02299	0.717187	1.45918	0.898645
ENSG00000267737	0.711043	0.494346	1.02273	0.052127
ENSG00000266970	0.787765	0.551024	1.12622	0.180565
Cluster166	0.656	0.445	0.965	0.0322
Cluster167
ENSG00000185168	0.785757	0.550513	1.12152	0.1781
ENSG00000263154	1.05768	0.740543	1.51064	0.754438
ENSG00000262223	1.17331	0.821852	1.67508	0.368488
ENSG00000262877	0.86369	0.604797	1.23341	0.41073
Cluster167	0.646	0.447	0.933	0.0198
Cluster177
ENSG00000267696	1.15042	0.806668	1.64066	0.430603
ENSG00000261824	1.38594	0.970755	1.9787	0.0684047
ENSG00000261770	1.1142	0.780924	1.5897	0.545125
ENSG00000267575	1.13046	0.791883	1.6138	0.491138
Cluster177	0.693	0.483	0.993	0.0457
Cluster190
ENSG00000272050	0.640967	0.155166	2.64774	0.440905
ENSG00000260542	0.693009	0.441253	1.0884	0.0724322
ENSG00000264490	0.889401	0.613086	1.29025	0.520775
Cluster190	0.556	0.364	0.851	0.00685
Cluster191
ENSG00000272259	1.18988	0.756371	1.87186	0.451967
ENSG00000125514	1.07544	0.644559	1.79435	0.784428
ENSG00000237119	0.442872	0.0552922	3.54725	0.238463
ENSG00000231133	0.753857	0.527537	1.07727	0.11399
ENSG00000225978	0.768565	0.538306	1.09732	0.139675
ENSG00000260416	1.06029	0.737042	1.52532	0.751709
ENSG00000231977	0.963256	0.675481	1.37363	0.834636
Cluster191	0.679	0.47	0.981	0.0392
Cluster198
ENSG00000234928	0.826276	0.579205	1.17874	0.28674
ENSG00000178248	0.960603	0.673287	1.37053	0.822745
ENSG00000225413	0.805244	0.490226	1.32269	0.351491
ENSG00000272733	0.939105	0.658546	1.33919	0.725901
Cluster198	0.678	0.468	0.98	0.0388
Cluster39
ENSG00000248227	1.2451	0.870665	1.78057	0.217343
ENSG00000249534	0.937653	0.657035	1.33812	0.719527
ENSG00000249667	1.03484	0.488065	2.19417	0.929447
ENSG00000251635	0.866689	0.558515	1.3449	0.499498
ENSG00000271958	1.35313	0.920729	1.98858	0.146287
Cluster39	0.686	0.474	0.992	0.0452
Cluster64
ENSG00000232325	0.709299	0.49607	1.01418	0.0544607
ENSG00000242611	1.03848	0.727885	1.4816	0.829059
ENSG00000242474	0.903552	0.633325	1.28908	0.570056
ENSG00000240859	0.770984	0.539412	1.10197	0.140319
ENSG00000261795	0.798511	0.559736	1.13914	0.209684
ENSG00000239715	0.890747	0.579316	1.3696	0.580052
Cluster64	0.607	0.42	0.876	0.00769
Cluster68
ENSG00000253696	0.719103	0.501837	1.03043	0.0637952
ENSG00000253764	0.756367	0.529327	1.08079	0.116774
ENSG00000270988	1.09751	0.769503	1.56533	0.604012
ENSG00000253805	0.884866	0.619539	1.26382	0.493009
Cluster68	0.67	0.457	0.983	0.0404
Cluster81
ENSG00000235007	0.823168	0.576275	1.17584	0.277103
ENSG00000241084	0.795994	0.557244	1.13704	0.20122
ENSG00000224307	0.890046	0.624137	1.26924	0.515011
ENSG00000268615	0.780859	0.547249	1.11419	0.165702
ENSG00000233901	0.776166	0.543705	1.10802	0.1522
Cluster81	0.592	0.409	0.856	0.00532
Cluster97
ENSG00000256281	1.06247	0.403291	2.79908	0.904327
ENSG00000255689	0.941378	0.557547	1.58945	0.815335
ENSG00000255599	0.99281	0.546182	1.80466	0.980861
ENSG00000260254	0.924824	0.63885	1.33881	0.671796
ENSG00000256717	0.886186	0.621352	1.2639	0.496813
Cluster97	0.648	0.452	0.929	0.0182
Cluster98
ENSG00000255546	0.895876	0.422253	1.90074	0.761905
ENSG00000255087	0.975543	0.673277	1.41351	0.894178
ENSG00000272981	1.17311	0.546393	2.51867	0.668855
ENSG00000272642	0.883675	0.200414	3.89634	0.86137
ENSG00000273409	1.34431	0.938177	1.92625	0.0926803
Cluster98	0.676	0.468	0.977	0.0374
HNSC
Cluster1
ENSG00000243485	1.10001	0.825806	1.46527	0.511804
ENSG00000237613	1.18438	0.889113	1.5777	0.244854
ENSG00000238009	1.04416	0.783894	1.39083	0.766429
ENSG00000239945	1.13667	0.853293	1.51416	0.376738
Cluster1	0.61	0.44	0.846	0.00305
Cluster103
ENSG00000259884	1.28505	0.964721	1.71173	0.0867187
ENSG00000257989	1.10941	0.818456	1.50379	0.506731
ENSG00000258279	1.011	0.758984	1.34671	0.940076
ENSG00000257137	1.27159	0.939702	1.72068	0.134371
Cluster103	0.704	0.496	0.999	0.0495
Cluster106
ENSG00000258220	0.706948	0.390261	1.28062	0.181536
ENSG00000258084	1.35933	0.906585	2.03818	0.181748
ENSG00000257879	1.3364	0.717837	2.48798	0.419791
ENSG00000257165	1.23797	0.693235	2.21073	0.491494
Cluster106	0.614	0.393	0.96	0.0326
Cluster107
ENSG00000246363	0.959132	0.720087	1.27753	0.774102
ENSG00000257156	1.23119	0.908398	1.66868	0.192294
ENSG00000271327	1.31259	0.985457	1.74833	0.0635069
ENSG00000271259	1.23206	0.924922	1.6412	0.152577
Cluster107	0.699	0.51	0.957	0.0255
Cluster110
ENSG00000256750	0.704375	0.0679943	7.29684	0.72493
ENSG00000255618	1.10311	0.53604	2.27009	0.798638
ENSG00000255814	2.63208	1.27917	5.4159	0.0792139
ENSG00000256149	1.67956	0.835697	3.37555	0.246248
Cluster110	0.42	0.197	0.897	0.0251
Cluster112
ENSG00000255944	1.13717	0.653938	1.9775	0.665153
ENSG00000255998	1.67425	0.953322	2.94036	0.148177
ENSG00000189238	1.17042	0.878709	1.55898	0.278773
ENSG00000256128	1.23354	0.926109	1.64304	0.149371
Cluster112	0.629	0.423	0.936	0.0222
Cluster119
ENSG00000257826	1.01137	0.623484	1.64057	0.963529
ENSG00000257585	0.765754	0.476224	1.23131	0.219672
ENSG00000259104	0.828606	0.592929	1.15796	0.244172
ENSG00000258844	0.743644	0.521181	1.06106	0.074842
Cluster119	0.671	0.486	0.926	0.0152
Cluster120
ENSG00000258955	1.02753	0.771442	1.36864	0.851856
ENSG00000258479	1.05764	0.794027	1.40876	0.700157
ENSG00000258942	1.09806	0.824279	1.46277	0.52047
ENSG00000258808	0.896675	0.673055	1.19459	0.453162
ENSG00000258537	0.878881	0.659836	1.17064	0.374443
Cluster120	0.708	0.53	0.945	0.019
Cluster13
ENSG00000231768	1.00474	0.754327	1.33829	0.973979
ENSG00000230404	0.959931	0.700157	1.31609	0.796127
ENSG00000224939	0.933162	0.700591	1.24294	0.634494
ENSG00000272362	1.12458	0.844178	1.49813	0.414337
ENSG00000228044	0.82304	0.617473	1.09704	0.179592
ENSG00000241475	0.872831	0.654454	1.16408	0.346547
ENSG00000230628	0.916255	0.687661	1.22084	0.547895
ENSG00000227630	0.959842	0.720553	1.2786	0.778095
Cluster13	0.691	0.508	0.94	0.0186
Cluster152
ENSG00000268078	1.31079	0.85487	2.00987	0.261371
ENSG00000268505	0.925224	0.666664	1.28407	0.634124
ENSG00000269186	1.002	0.708765	1.41654	0.990959
ENSG00000270058	1.15495	0.867092	1.53836	0.323305
ENSG00000268754	0.986937	0.711692	1.36863	0.936731
ENSG00000268532	1.15788	0.781263	1.71604	0.48535
ENSG00000168367	1.1142	0.822172	1.50996	0.490856
ENSG00000269826	1.18831	0.875143	1.61354	0.281981
Cluster152	0.705	0.498	0.997	0.0481
Cluster153
ENSG00000260387	0.61979	0.240793	1.59531	0.209122
ENSG00000261161	1.12146	0.819278	1.53509	0.48366
ENSG00000260026	1.44904	0.994416	2.1115	0.0853373
ENSG00000261175	0.943445	0.708311	1.25663	0.6862
Cluster153	0.619	0.392	0.977	0.0394
Cluster155
ENSG00000266824	0.811748	0.609388	1.08131	0.150323
ENSG00000178977	1.16724	0.875681	1.55588	0.286664
ENSG00000269947	0.9435	0.708336	1.25674	0.688577
ENSG00000266279	1.03884	0.670089	1.61052	0.866016
Cluster155	0.709	0.523	0.961	0.0267
Cluster165
ENSG00000177338	0.98332	0.673782	1.43506	0.928886
ENSG00000234721	0.879124	0.593772	1.30161	0.494109
ENSG00000265927	1.99738	1.14755	3.47656	0.0660569
ENSG00000266765	3.22142	1.45507	7.13201	0.0811535
Cluster165	0.42	0.222	0.795	0.00768
Cluster166
ENSG00000204277	1.29438	0.971452	1.72465	0.0765657
ENSG00000267737	0.973675	0.731001	1.29691	0.854564
ENSG00000266970	0.901738	0.676683	1.20164	0.47714
Cluster166	0.713	0.51	0.995	0.0466
Cluster184
ENSG00000226995	1.00775	0.708737	1.43291	0.965304
ENSG00000230563	0.967763	0.725987	1.29006	0.821186
ENSG00000205181	0.877209	0.658563	1.16845	0.369192
ENSG00000266908	0.94202	0.707157	1.25489	0.682055
ENSG00000225640	1.33686	0.908178	1.9679	0.179877
Cluster184	0.693	0.51	0.942	0.0191
Cluster194
ENSG00000232837	1.08302	0.803511	1.45977	0.602154
ENSG00000235888	0.968031	0.725797	1.29111	0.822183
ENSG00000237721	1.22228	0.917502	1.62831	0.168395
ENSG00000237609	0.970748	0.728629	1.29332	0.837601
Cluster194	0.71	0.53	0.953	0.0223
Cluster2
ENSG00000228463	0.781153	0.585991	1.04131	0.0874226
ENSG00000236743	0.868544	0.651682	1.15757	0.331744
ENSG00000236601	1.26029	0.945906	1.67918	0.11109
ENSG00000237094	1.2666	0.950732	1.68741	0.105199
Cluster2	0.719	0.537	0.963	0.0267
Cluster3
ENSG00000237491	1.13071	0.848862	1.50614	0.399953
ENSG00000177757	1.17245	0.880191	1.56176	0.274636
ENSG00000225880	1.25231	0.940186	1.66806	0.123776
ENSG00000230368	0.842177	0.632259	1.12179	0.238802
ENSG00000272438	0.990864	0.743868	1.31987	0.949573
ENSG00000230699	0.96122	0.721433	1.28071	0.784098
ENSG00000241180	0.865858	0.647897	1.15714	0.320393
ENSG00000223764	0.794244	0.596296	1.0579	0.11468
Cluster3	0.679	0.495	0.93	0.0159
Cluster34
ENSG00000272970	0.856817	0.643273	1.14125	0.289862
ENSG00000273403	0.843567	0.633305	1.12364	0.243219
ENSG00000272922	0.933146	0.700494	1.24307	0.633869
ENSG00000229433	1.10705	0.821269	1.49227	0.506477
Cluster34	0.741	0.554	0.991	0.0434
Cluster35
ENSG00000236864	1.15237	0.719611	1.84539	0.564746
ENSG00000224187	1.00014	0.724933	1.37981	0.999334
ENSG00000225058	1.10939	0.669277	1.83893	0.699095
ENSG00000236412	1.49158	0.910138	2.44448	0.174328
Cluster35	0.668	0.451	0.991	0.0451
Cluster40
ENSG00000251185	0.883808	0.663456	1.17734	0.395989
ENSG00000251454	1.33065	0.758538	2.33428	0.376276
ENSG00000251383	1.17906	0.585489	2.37441	0.668239
ENSG00000248646	0.698989	0.403256	1.2116	0.135957
ENSG00000250735	0.8325	0.622686	1.11301	0.207985
Cluster40	0.69	0.486	0.979	0.0375
Cluster57
ENSG00000253959	1.45216	0.970049	2.17387	0.110396
ENSG00000253428	1.39013	0.977688	1.97656	0.0930337
ENSG00000253686	1.09308	0.820645	1.45595	0.540872
ENSG00000254211	1.20683	0.906031	1.6075	0.197686
Cluster57	0.68	0.486	0.952	0.0246
Cluster59
ENSG00000228478	0.947851	0.684264	1.31298	0.741683
ENSG00000183674	0.988985	0.742305	1.31764	0.939114
ENSG00000229401	1.03003	0.773299	1.37199	0.838481
ENSG00000231056	1.35549	1.00224	1.83323	0.0596432
Cluster59	0.64	0.431	0.952	0.0276
Cluster7
ENSG00000272226	0.967326	0.726191	1.28853	0.819608
ENSG00000231740	1.57419	1.04605	2.36898	0.0598739
ENSG00000232453	0.95565	0.717473	1.27289	0.754788
ENSG00000237352	1.23515	0.9267	1.64627	0.145349
Cluster7	0.55	0.358	0.845	0.00634
Cluster76
ENSG00000248599	1.29447	0.971813	1.72425	0.0765954
ENSG00000253395	1.10257	0.827281	1.46947	0.501644
ENSG00000253737	0.887767	0.666408	1.18265	0.413346
ENSG00000261087	1.0365	0.777955	1.38098	0.805599
ENSG00000271882	0.929214	0.697579	1.23777	0.611263
ENSG00000253679	1.22976	0.901999	1.67662	0.206442
ENSG00000253282	0.90522	0.613774	1.33506	0.601714
Cluster76	0.665	0.485	0.911	0.011
Cluster79
ENSG00000218839	1.50296	0.901105	2.5068	0.185389
ENSG00000227917	1.08069	0.784614	1.48848	0.637781
ENSG00000231808	1.17044	0.87859	1.55925	0.282553
Cluster79	0.544	0.373	0.793	0.00155
Cluster84
ENSG00000237579	1.32622	0.995188	1.76737	0.0542082
ENSG00000229649	1.25055	0.933328	1.67559	0.139929
ENSG00000225208	1.16779	0.783992	1.73947	0.462228
ENSG00000230967	1.33334	0.854567	2.08036	0.253191
Cluster84	0.664	0.449	0.982	0.0401
Cluster85
ENSG00000270105	1.30386	0.978254	1.73784	0.0724451
ENSG00000270030	1.29969	0.975725	1.73122	0.0720762
ENSG00000255328	0.984244	0.738815	1.3112	0.912902
ENSG00000270972	0.969892	0.728065	1.29204	0.833558
Cluster85	0.677	0.495	0.925	0.0144
Cluster90
ENSG00000254653	1.16452	0.860118	1.57666	0.333911
ENSG00000255314	1.08958	0.800885	1.48233	0.589889
ENSG00000255269	1.18034	0.807419	1.72551	0.410841
ENSG00000254639	0.799402	0.599926	1.0652	0.122206
Cluster90	0.722	0.524	0.994	0.046
Cluster93
ENSG00000245532	0.94377	0.708539	1.2571	0.690566
ENSG00000251562	0.941535	0.706858	1.25412	0.679382
ENSG00000270117	0.942543	0.707616	1.25546	0.684435
Cluster93	0.717	0.534	0.962	0.0264
KICH
Cluster127
ENSG00000214548	0.553967	0.146693	2.09199	0.370712
ENSG00000258399	0.690806	0.186363	2.56066	0.57872
ENSG00000225746	0.399669	0.107317	1.48843	0.178639
ENSG00000258861	Inf	Inf	Inf	0.552697
ENSG00000223403	1.05503	0.284286	3.91537	0.936294
ENSG00000230805	1.66457	0.41134	6.73599	0.520515
ENSG00000259004	0.428421	0.115534	1.58866	0.216645
Cluster127	0.123	0.0303	0.498	0.00333
Cluster177
ENSG00000267696	0.274456	0.074283	1.01404	0.0834227
ENSG00000261824	0.382358	0.102303	1.42906	0.156565
ENSG00000261770	0.847314	0.229267	3.13146	0.804554
ENSG00000267575	0.24342	0.0656246	0.902911	0.0556729
Cluster177	0.111	0.0139	0.891	0.0386
Cluster39
ENSG00000248227	0.725626	0.196142	2.68446	0.630721
ENSG00000249534	1.57169	0.269445	9.16782	0.667148
ENSG00000249667	2.1176	0.424992	10.5514	0.468373
ENSG00000251635	3.49672	0.845103	14.4681	0.207639
ENSG00000271958	0.632329	0.137024	2.91804	0.512858
Cluster39	0.187	0.0387	0.9	0.0365
KIRC
Cluster109
ENSG00000258249	1.1248	0.827429	1.52903	0.452837
ENSG00000257883	1.31334	0.965656	1.7862	0.0816303
ENSG00000257654	1.06828	0.785858	1.45221	0.672999
Cluster109	0.669	0.482	0.927	0.0157
Cluster111
ENSG00000249267	1.04855	0.771223	1.4256	0.761427
ENSG00000256276	0.770399	0.566504	1.04768	0.0936448
ENSG00000256342	0.62265	0.343479	1.12873	0.0553365
Cluster111	0.484	0.348	0.673	1.65e-05
Cluster125
ENSG00000258826	0.802895	0.584879	1.10218	0.163706
ENSG00000258867	0.764487	0.562302	1.03937	0.0865432
ENSG00000258975	1.08659	0.586299	2.01378	0.798859
ENSG00000259998	1.26108	0.854758	1.86055	0.276641
ENSG00000258538	0.755794	0.45362	1.25926	0.228967
Cluster125	0.642	0.471	0.875	0.00499
Cluster139
ENSG00000259664	0.779919	0.569597	1.0679	0.112692
ENSG00000259582	0.796519	0.550532	1.15242	0.199352
ENSG00000259870	0.638324	0.311895	1.30639	0.129987
Cluster139	0.667	0.484	0.92	0.0137
Cluster16
ENSG00000227713	0.81728	0.591039	1.13012	0.207722
ENSG00000272342	0.998151	0.734264	1.35688	0.99057
ENSG00000231173	1.06501	0.767694	1.47748	0.709046
ENSG00000223751	0.94561	0.695615	1.28545	0.720924
ENSG00000237667	1.20266	0.884182	1.63585	0.243265
ENSG00000228799	1.30826	0.907288	1.88644	0.181615
Cluster16	0.705	0.501	0.991	0.0444
Cluster160
ENSG00000267644	0.771004	0.567157	1.04812	0.098011
ENSG00000267259	0.927248	0.682076	1.26055	0.629933
ENSG00000266830	0.809643	0.591552	1.10814	0.1781
ENSG00000264486	0.875975	0.639	1.20083	0.403739
ENSG00000260777	0.79496	0.584594	1.08103	0.142145
Cluster160	0.506	0.372	0.689	1.5e-05
Cluster168
ENSG00000261888	0.899163	0.661448	1.22231	0.497504
ENSG00000262898	0.829385	0.579045	1.18796	0.284563
ENSG00000262952	0.828619	0.609536	1.12645	0.230436
ENSG00000262094	0.77565	0.570588	1.05441	0.106542
Cluster168	0.64	0.47	0.872	0.00473
Cluster169
ENSG00000267051	0.988042	0.711451	1.37216	0.942599
ENSG00000273119	1.04487	0.703324	1.55229	0.829887
ENSG00000267564	1.44946	0.926554	2.26748	0.155939
ENSG00000267425	1.381	1.01107	1.88628	0.0500617
ENSG00000267252	1.36638	0.975335	1.9142	0.0903091
Cluster169	0.635	0.412	0.979	0.0399
Cluster24
ENSG00000232597	0.69918	0.243476	2.00781	0.427211
ENSG00000236141	1.47148	0.643285	3.36591	0.442285
ENSG00000256637	0.846935	0.622954	1.15145	0.288333
ENSG00000228968	0.817805	0.4986	1.34137	0.387297
Cluster24	0.69	0.493	0.967	0.0311
Cluster35
ENSG00000236864	1.42525	0.543436	3.73794	0.540782
ENSG00000224187	0.748235	0.511961	1.09355	0.103837
ENSG00000225058	1.40716	0.965768	2.05027	0.108458
ENSG00000236412	1.03972	0.706394	1.53033	0.845135
Cluster35	0.546	0.321	0.929	0.0257
Cluster36
ENSG00000225742	1.01708	0.748192	1.38261	0.913686
ENSG00000238097	1.05463	0.775089	1.43499	0.733511
ENSG00000228271	0.833669	0.61315	1.1335	0.243721
ENSG00000214145	1.22932	0.904308	1.67116	0.187512
Cluster36	0.486	0.357	0.663	4.91e-06
Cluster52
ENSG00000248942	0.745608	0.441084	1.26038	0.216099
ENSG00000251041	0.717193	0.403326	1.27531	0.190781
ENSG00000249343	0.790775	0.461711	1.35437	0.34466
ENSG00000250446	1.10705	0.561454	2.18284	0.778712
ENSG00000248673	0.927622	0.57899	1.48618	0.747374
Cluster52	0.641	0.449	0.914	0.0141
Cluster58
ENSG00000272463	0.898962	0.661249	1.22213	0.496213
ENSG00000271727	0.802313	0.59012	1.0908	0.1599
ENSG00000271911	0.807187	0.593769	1.09732	0.171807
ENSG00000272485	0.764901	0.562531	1.04007	0.0872285
Cluster58	0.681	0.5	0.927	0.0146
Cluster77
ENSG00000253573	0.80788	0.564252	1.1567	0.218713
ENSG00000253438	1.11279	0.818535	1.51283	0.493785
ENSG00000253264	0.742222	0.540058	1.02006	0.0564896
Cluster77	0.623	0.455	0.853	0.00313
Cluster78
ENSG00000259820	0.974332	0.716741	1.3245	0.867707
ENSG00000254028	0.827081	0.608353	1.12445	0.225375
ENSG00000253433	1.06452	0.783015	1.44723	0.689467
ENSG00000251218	0.76974	0.52644	1.12548	0.145405
Cluster78	0.624	0.457	0.852	0.00295
Cluster93
ENSG00000245532	0.928007	0.682629	1.26159	0.63309
ENSG00000251562	0.808048	0.594357	1.09857	0.173761
ENSG00000270117	0.957539	0.70439	1.30167	0.781677
Cluster93	0.683	0.501	0.932	0.0161
KIRP
Cluster106
ENSG00000258220	0.603676	0.225395	1.61683	0.22604
ENSG00000258084	0.734977	0.367397	1.47032	0.387573
ENSG00000257879	0.823179	0.266134	2.54617	0.714579
ENSG00000257165	0.571298	0.194004	1.68234	0.209104
Cluster106	0.397	0.191	0.825	0.0133
Cluster109
ENSG00000258249	1.8965	0.94114	3.82164	0.090971
ENSG00000257883	1.19034	0.594981	2.38145	0.619401
ENSG00000257654	0.808451	0.370011	1.76642	0.574719
Cluster109	0.346	0.131	0.91	0.0314
Cluster116
ENSG00000272695	0.791928	0.395309	1.58648	0.51358
ENSG00000237699	1.07757	0.340035	3.41484	0.900979
ENSG00000226921	1.92536	0.829248	4.47035	0.204942
ENSG00000229373	0.664762	0.330141	1.33854	0.243386
ENSG00000260910	0.622348	0.310993	1.24542	0.181175
Cluster116	0.334	0.154	0.723	0.00538
Cluster119
ENSG00000257826	0.653795	0.250826	1.70416	0.303769
ENSG00000257585	0.914247	0.443049	1.88658	0.80337
ENSG00000259104	1.70609	0.840894	3.46149	0.113389
ENSG00000258844	0.606179	0.296606	1.23886	0.147854
Cluster119	0.424	0.212	0.851	0.0158
Cluster120
ENSG00000258955	0.530846	0.264921	1.0637	0.0885368
ENSG00000258479	0.638154	0.319005	1.2766	0.206647
ENSG00000258942	0.630917	0.282957	1.40677	0.210168
ENSG00000258808	1.1313	0.565016	2.26515	0.726171
ENSG00000258537	0.701382	0.312246	1.57548	0.346344
Cluster120	0.474	0.226	0.994	0.048
Cluster128
ENSG00000258701	1.883	0.940469	3.77013	0.0755669
ENSG00000258811	0.675219	0.33767	1.35019	0.271165
ENSG00000258593	1.19839	0.599057	2.39735	0.610319
ENSG00000259067	1.63257	0.718575	3.70914	0.308409
Cluster128	0.469	0.222	0.994	0.0481
Cluster132
ENSG00000259616	0.778145	0.296624	2.04134	0.575252
ENSG00000259530	0.676079	0.166427	2.74645	0.514822
ENSG00000259675	0.543997	0.208045	1.42244	0.122552
ENSG00000259284	1.45355	0.272236	7.76094	0.709422
Cluster132	0.467	0.23	0.948	0.035
Cluster156
ENSG00000262786	1.1955	0.447975	3.19038	0.737523
ENSG00000266709	0.874305	0.43672	1.75034	0.703492
ENSG00000266378	0.811927	0.405013	1.62766	0.558839
ENSG00000230647	0.979289	0.451529	2.12391	0.957248
Cluster156	0.437	0.196	0.976	0.0435
Cluster157
ENSG00000233193	0.594411	0.0464075	7.61353	0.603135
ENSG00000265519	1.89952	0.949941	3.7983	0.0759364
ENSG00000237057	1.30481	0.573801	2.96712	0.554781
Cluster157	0.202	0.0707	0.576	0.00277
Cluster160
ENSG00000267644	1.41951	0.709843	2.83868	0.326664
ENSG00000267259	0.92407	0.458518	1.86232	0.824125
ENSG00000266830	0.907933	0.453114	1.81928	0.781812
ENSG00000264486	0.740872	0.367627	1.49307	0.388393
ENSG00000260777	0.695477	0.34539	1.40041	0.322841
Cluster160	0.437	0.201	0.951	0.0369
Cluster166
ENSG00000204277	0.930384	0.46517	1.86086	0.837245
ENSG00000267737	1.87993	0.938138	3.76719	0.0897491
ENSG00000266970	0.589849	0.29442	1.18172	0.1355
Cluster166	0.434	0.2	0.94	0.0342
Cluster169
ENSG00000267051	0.634766	0.311791	1.2923	0.188895
ENSG00000273119	0.874444	0.405689	1.88483	0.722549
ENSG00000267564	0.81429	0.315088	2.10439	0.646291
ENSG00000267425	0.608586	0.300726	1.23161	0.146848
ENSG00000267252	0.522722	0.238053	1.14781	0.0636641
Cluster169	0.381	0.188	0.775	0.00771
Cluster180
ENSG00000267767	1.8455	0.92284	3.69065	0.0926019
ENSG00000261754	1.8736	0.935872	3.75092	0.0785943
ENSG00000269086	1.1219	0.553473	2.27411	0.74465
ENSG00000271109	1.31872	0.658884	2.63934	0.439035
ENSG00000271649	2.03959	0.70144	5.93057	0.315636
ENSG00000270544	1.368	0.478067	3.91459	0.602966
ENSG00000271171	1.92546	0.758971	4.88478	0.265718
ENSG00000269037	1.2929	0.590121	2.83264	0.544678
ENSG00000270876	1.28941	0.644832	2.57832	0.471869
Cluster180	0.43	0.185	0.996	0.0488
Cluster2
ENSG00000228463	1.72276	0.860759	3.44799	0.137379
ENSG00000236743	1.4501	0.725186	2.89964	0.296587
ENSG00000236601	1.03174	0.515577	2.06466	0.928908
ENSG00000237094	0.974083	0.483891	1.96085	0.939638
Cluster2	0.434	0.194	0.968	0.0415
Cluster20
ENSG00000226785	0.940657	0.441488	2.00421	0.869003
ENSG00000228262	0.489596	0.244729	0.979469	0.0549806
ENSG00000272027	1.1646	0.579814	2.33918	0.669024
ENSG00000232153	1.53171	0.762789	3.07573	0.240798
Cluster20	0.321	0.124	0.836	0.0199
Cluster37
ENSG00000233987	1.66007	0.688431	4.00307	0.327302
ENSG00000237222	1.46439	0.728176	2.94493	0.269139
ENSG00000230401	1.02124	0.443885	2.34955	0.960656
ENSG00000238031	4.07973	1.3844	12.0227	0.126059
Cluster37	0.282	0.0969	0.823	0.0205
Cluster54
ENSG00000212930	0.668603	0.195787	2.28325	0.445849
ENSG00000251093	0.609996	0.263227	1.41359	0.185691
ENSG00000234292	1.12706	0.560719	2.26542	0.729947
ENSG00000248323	0.513242	0.256662	1.02632	0.0675139
ENSG00000271762	0.726536	0.363193	1.45337	0.366785
Cluster54	0.426	0.21	0.864	0.018
Cluster61
ENSG00000236700	0.58395	0.290447	1.17404	0.145616
ENSG00000232310	1.36841	0.67852	2.75975	0.365546
ENSG00000229722	3.308	1.02277	10.6992	0.211209
ENSG00000227723	0.933907	0.397283	2.19537	0.872538
Cluster61	0.465	0.227	0.954	0.0368
Cluster72
ENSG00000251191	0.608816	0.304108	1.21883	0.162425
ENSG00000253490	1.05279	0.526252	2.10617	0.884223
ENSG00000248964	1.12738	0.5638	2.25433	0.7345
ENSG00000254086	4.39746	1.53819	12.5717	0.104857
ENSG00000253604	2.04351	0.703337	5.93734	0.314583
ENSG00000253279	3.09548	1.23349	7.76822	0.0997446
Cluster72	0.202	0.0613	0.663	0.00835
Cluster86
ENSG00000255411	0.59627	0.0467312	7.60816	0.605241
ENSG00000254927	0.62768	0.313012	1.25868	0.205798
ENSG00000254930	0.412048	0.090832	1.8692	0.0845384
ENSG00000254438	1.81151	0.905389	3.6245	0.0978838
Cluster86	0.325	0.125	0.846	0.0212
Cluster87
ENSG00000254946	0.732897	0.306361	1.75329	0.442715
ENSG00000254789	1.24552	0.61308	2.53036	0.554293
ENSG00000254645	0.521257	0.242617	1.11991	0.0617651
Cluster87	0.395	0.167	0.934	0.0344
LGG
Cluster116
ENSG00000272695	0.743719	0.519713	1.06428	0.100872
ENSG00000237699	1.64649	0.664525	4.07951	0.387117
ENSG00000226921	0.879621	0.564224	1.37132	0.555467
ENSG00000229373	1.20556	0.844129	1.72174	0.302023
ENSG00000260910	0.761847	0.532287	1.09041	0.130863
Cluster116	0.463	0.322	0.665	3.09e-05
Cluster128
ENSG00000258701	0.873784	0.611488	1.24859	0.458679
ENSG00000258811	1.30849	0.916141	1.86887	0.141164
ENSG00000258593	1.10421	0.772417	1.57853	0.586667
ENSG00000259067	0.947193	0.662391	1.35445	0.763323
Cluster128	0.551	0.375	0.811	0.00252
Cluster143
ENSG00000261617	0.826413	0.576747	1.18416	0.284179
ENSG00000261397	0.72091	0.329422	1.57765	0.341674
ENSG00000261075	1.44754	0.755106	2.77495	0.336645
ENSG00000260071	1.11479	0.779913	1.59345	0.551592
Cluster143	0.583	0.399	0.852	0.00528
Cluster188
ENSG00000260032	1.24373	0.870482	1.77702	0.227897
ENSG00000234139	0.868493	0.608047	1.2405	0.436722
ENSG00000237063	0.788034	0.551786	1.12543	0.190401
Cluster188	0.585	0.404	0.847	0.00449
Cluster2
ENSG00000228463	0.716889	0.500929	1.02595	0.0636441
ENSG00000236743	1.24858	0.874285	1.78313	0.223138
ENSG00000236601	1.26638	0.885877	1.81033	0.199995
ENSG00000237094	0.730489	0.510286	1.04572	0.0779286
Cluster2	0.559	0.388	0.807	0.00189
Cluster21
ENSG00000224739	1.00831	0.704691	1.44276	0.963674
ENSG00000231826	0.759492	0.531437	1.08541	0.129031
ENSG00000233978	1.0281	0.708201	1.49249	0.883442
ENSG00000230587	0.819357	0.573668	1.17027	0.2725
Cluster21	0.426	0.294	0.617	6.35e-06
Cluster32
ENSG00000241131	0.74198	0.519495	1.05975	0.101121
ENSG00000241792	0.638625	0.279336	1.46004	0.189286
ENSG00000244650	0.964553	0.526799	1.76607	0.90276
ENSG00000243347	0.442578	0.0552189	3.54726	0.238377
ENSG00000242440	0.715037	0.430261	1.1883	0.144883
Cluster32	0.618	0.424	0.902	0.0125
Cluster41
ENSG00000251432	1.13839	0.793393	1.63341	0.480272
ENSG00000273077	0.855023	0.598024	1.22247	0.389391
ENSG00000248187	0.827932	0.579718	1.18242	0.300241
ENSG00000248802	0.798839	0.55907	1.14144	0.208124
Cluster41	0.554	0.386	0.795	0.00138
Cluster43
ENSG00000249521	0.713692	0.137558	3.70285	0.633679
ENSG00000248311	0.289737	0.0222687	3.76976	0.0635731
ENSG00000248467	0.26872	0.00617166	11.7003	0.159497
ENSG00000249941	0.379514	0.0401916	3.5836	0.157148
Cluster43	0.436	0.191	0.997	0.0491
Cluster45
ENSG00000248677	0.986346	0.690376	1.4092	0.939254
ENSG00000251365	0.818103	0.571988	1.17012	0.26498
ENSG00000272071	1.03691	0.726059	1.48084	0.841599
ENSG00000249734	1.18592	0.830178	1.6941	0.350116
ENSG00000250060	1.02037	0.71415	1.4579	0.911318
ENSG00000250974	1.2053	0.843945	1.72137	0.304904
Cluster45	0.656	0.458	0.94	0.0215
Cluster52
ENSG00000248942	2.53031	1.31014	4.88687	0.0558332
ENSG00000251041	1.3708	0.887427	2.11746	0.193591
ENSG00000249343	1.22207	0.827222	1.80539	0.331455
ENSG00000250446	1.06199	0.729843	1.54531	0.754496
ENSG00000248673	1.04971	0.734894	1.4994	0.787333
Cluster52	0.571	0.337	0.969	0.0376
Cluster63
ENSG00000234986	2.57452	0.743124	8.91934	0.327085
ENSG00000213863	0.998458	0.697185	1.42992	0.993242
ENSG00000230423	1.07213	0.750719	1.53116	0.701438
ENSG00000225532	1.15401	0.80793	1.64833	0.42998
Cluster63	0.66	0.445	0.978	0.0383
Cluster68
ENSG00000253696	1.20148	0.841261	1.71593	0.313408
ENSG00000253764	0.903278	0.632419	1.29014	0.574323
ENSG00000270988	1.14411	0.801122	1.63393	0.456737
ENSG00000253805	1.00092	0.700168	1.43087	0.995901
Cluster68	0.623	0.433	0.897	0.0108
LIHC
Cluster105
ENSG00000270039	1.40248	0.92525	2.12584	0.108282
ENSG00000269903	1.22201	0.806529	1.85152	0.344473
ENSG00000245651	0.831463	0.548019	1.26151	0.380192
ENSG00000257698	0.915836	0.600904	1.39582	0.678214
Cluster105	0.481	0.303	0.764	0.00194
Cluster107
ENSG00000246363	1.13989	0.752314	1.72712	0.535302
ENSG00000257156	0.618484	0.325872	1.17384	0.0756627
ENSG00000271327	0.97309	0.641101	1.47699	0.897744
ENSG00000271259	1.11143	0.731447	1.6888	0.621889
Cluster107	0.634	0.411	0.98	0.0402
Cluster125
ENSG00000258826	1.38979	0.914333	2.11249	0.133061
ENSG00000258867	1.09714	0.723616	1.66347	0.660317
ENSG00000258975	1.19144	0.643718	2.20519	0.598718
ENSG00000259998	1.24434	0.777169	1.99234	0.384377
ENSG00000258538	0.844624	0.418041	1.70651	0.613449
Cluster125	0.537	0.326	0.886	0.0148
Cluster133
ENSG00000259697	1.0516	0.55161	2.0048	0.879788
ENSG00000259878	1.16737	0.688392	1.97962	0.580621
ENSG00000261296	1.11055	0.712935	1.72993	0.648578
ENSG00000260957	0.552179	0.16906	1.80351	0.188135
Cluster133	0.525	0.296	0.93	0.0272
Cluster150
ENSG00000261404	1.28036	0.840702	1.94996	0.234205
ENSG00000261248	1.29862	0.731191	2.30638	0.41118
ENSG00000260884	0.952218	0.626396	1.44752	0.815974
ENSG00000261079	1.46152	0.96375	2.2164	0.0690573
Cluster150	0.622	0.402	0.963	0.0332
Cluster154
ENSG00000260162	0.9368	0.618043	1.41996	0.757112
ENSG00000261327	1.12183	0.740411	1.69974	0.587404
ENSG00000261816	1.04239	0.687559	1.58035	0.844213
ENSG00000260420	0.685632	0.443332	1.06036	0.0717308
ENSG00000261273	1.14144	0.69373	1.8781	0.611312
Cluster154	0.647	0.42	0.996	0.0478
Cluster162
ENSG00000249383	1.37822	0.726899	2.61313	0.380725
ENSG00000249982	0.262864	0.00580672	11.8996	0.151484
ENSG00000249658	0.617473	0.200764	1.89911	0.28831
ENSG00000225860	0.664203	0.362018	1.21863	0.125135
Cluster162	0.455	0.267	0.776	0.00384
Cluster182
ENSG00000268307	0.741718	0.485239	1.13376	0.155505
ENSG00000232098	1.09666	0.722262	1.66512	0.664491
ENSG00000268912	0.999375	0.658171	1.51746	0.997631
ENSG00000269473	0.847153	0.556086	1.29057	0.427492
Cluster182	0.525	0.339	0.813	0.00385
Cluster184
ENSG00000226995	1.04001	0.558323	1.93726	0.901531
ENSG00000230563	0.669212	0.440776	1.01604	0.0569028
ENSG00000205181	0.687396	0.452061	1.04524	0.0741734
ENSG00000266908	0.843176	0.556323	1.27794	0.41948
ENSG00000225640	0.609818	0.23397	1.58942	0.203029
Cluster184	0.641	0.416	0.99	0.045
Cluster199
ENSG00000273145	0.781563	0.512384	1.19215	0.239559
ENSG00000231010	0.807975	0.531727	1.22774	0.310094
ENSG00000235159	1.39663	0.92029	2.11953	0.108851
Cluster199	0.47	0.301	0.734	0.000908
Cluster22
ENSG00000259439	0.903305	0.595298	1.37067	0.630413
ENSG00000236502	0.716863	0.337856	1.52104	0.317848
ENSG00000225156	0.80644	0.483954	1.34382	0.377563
ENSG00000231156	0.936147	0.530778	1.6511	0.813473
Cluster22	0.565	0.352	0.906	0.0179
Cluster3
ENSG00000237491	0.780726	0.511815	1.19092	0.238589
ENSG00000177757	1.11002	0.732247	1.68269	0.621509
ENSG00000225880	0.985587	0.650263	1.49383	0.945085
ENSG00000230368	0.799244	0.524401	1.21813	0.282086
ENSG00000272438	0.92003	0.570701	1.48319	0.725979
ENSG00000230699	0.885094	0.583075	1.34355	0.561393
ENSG00000241180	1.3045	0.828955	2.05285	0.272015
ENSG00000223764	1.08144	0.708612	1.65043	0.70466
Cluster3	0.656	0.43	0.999	0.0492
Cluster33
ENSG00000241220	0.742278	0.482318	1.14235	0.149242
ENSG00000241912	0.855376	0.550824	1.32832	0.475425
ENSG00000243012	1.14794	0.577528	2.28172	0.7085
Cluster33	0.635	0.41	0.984	0.0423
Cluster39
ENSG00000248227	1.12384	0.693618	1.8209	0.644047
ENSG00000249534	0.752066	0.371381	1.52297	0.370574
ENSG00000249667	1.6783	0.971689	2.89877	0.117391
ENSG00000251635	4.49526	1.71061	11.8129	0.0997652
ENSG00000271958	1.08567	0.45481	2.59158	0.857352
Cluster39	0.499	0.258	0.966	0.039
Cluster47
ENSG00000249807	0.904524	0.530635	1.54186	0.702852
ENSG00000260515	0.816036	0.534944	1.24483	0.331604
ENSG00000271998	0.739593	0.483789	1.13065	0.148143
ENSG00000272417	0.72666	0.477404	1.10605	0.12414
Cluster47	0.594	0.383	0.921	0.0201
Cluster74
ENSG00000253301	1.00162	0.66065	1.51857	0.993883
ENSG00000253614	1.0745	0.160215	7.20631	0.942877
ENSG00000215117	0.731997	0.192953	2.77694	0.59262
ENSG00000253871	0.422202	0.110169	1.61801	0.0516555
Cluster74	0.445	0.213	0.93	0.0313
Cluster80
ENSG00000235659	0.776427	0.511918	1.17761	0.227726
ENSG00000223379	0.757635	0.374918	1.53103	0.384605
ENSG00000229697	0.751047	0.370735	1.5215	0.370601
Cluster80	0.62	0.402	0.956	0.0306
LUAD
Cluster119
ENSG00000257826	1.2846	0.950413	1.7363	0.10114
ENSG00000257585	1.30337	0.963878	1.76243	0.0820557
ENSG00000259104	1.13165	0.837806	1.52856	0.420167
ENSG00000258844	1.29579	0.957706	1.75323	0.089219
Cluster119	0.68	0.481	0.963	0.0297
Cluster139
ENSG00000259664	0.727096	0.513299	1.02994	0.052597
ENSG00000259582	1.01856	0.721903	1.43712	0.916489
ENSG00000259870	0.562636	0.12425	2.54777	0.315933
Cluster139	0.66	0.47	0.927	0.0166
Cluster147
ENSG00000249231	0.882768	0.653167	1.19308	0.413205
ENSG00000260963	0.783496	0.575508	1.06665	0.110863
ENSG00000261261	0.925663	0.21762	3.93738	0.913389
Cluster147	0.555	0.365	0.845	0.00603
Cluster153
ENSG00000260387	0.466857	0.111363	1.95715	0.122335
ENSG00000261161	0.684666	0.411764	1.13844	0.0862172
ENSG00000260026	0.809075	0.386481	1.69375	0.53467
ENSG00000261175	1.09308	0.80895	1.47701	0.562329
Cluster153	0.654	0.431	0.993	0.0462
Cluster175
ENSG00000267723	0.97733	0.722049	1.32287	0.881631
ENSG00000267406	0.992062	0.716785	1.37306	0.96157
ENSG00000266913	1.09816	0.812947	1.48345	0.541711
ENSG00000267147	0.803757	0.595034	1.08569	0.154372
Cluster175	0.708	0.523	0.96	0.026
Cluster18
ENSG00000260476	0.891765	0.606857	1.31043	0.544234
ENSG00000260077	1.25015	0.925498	1.68869	0.145823
ENSG00000272524	0.909957	0.673453	1.22952	0.537296
Cluster18	0.721	0.529	0.984	0.0394
Cluster27
ENSG00000236049	0.810307	0.387268	1.69546	0.537258
ENSG00000237220	1.21621	0.676426	2.18675	0.546528
ENSG00000232359	3.0846	1.36775	6.95649	0.0885584
ENSG00000224048	0.917874	0.583139	1.44475	0.70154
Cluster27	0.482	0.236	0.985	0.0453
Cluster36
ENSG00000225742	1.23748	0.915205	1.67323	0.16347
ENSG00000238097	1.02952	0.759562	1.39543	0.8514
ENSG00000228271	1.02047	0.755077	1.37914	0.895072
ENSG00000214145	0.934369	0.691534	1.26248	0.656557
Cluster36	0.734	0.539	0.999	0.0493
Cluster70
ENSG00000253252	0.918895	0.615886	1.37098	0.669494
ENSG00000248538	0.797812	0.58952	1.0797	0.137425
ENSG00000254235	0.856471	0.634078	1.15687	0.313206
Cluster70	0.656	0.463	0.93	0.018
Cluster78
ENSG00000259820	1.09765	0.812196	1.48342	0.54469
ENSG00000254028	1.08395	0.802457	1.46418	0.598311
ENSG00000253433	1.15063	0.850737	1.55625	0.357157
ENSG00000251218	0.844826	0.624791	1.14235	0.270182
Cluster78	0.716	0.522	0.981	0.0375
Cluster93
ENSG00000245532	1.06943	0.791731	1.44453	0.659912
ENSG00000251562	1.08588	0.803917	1.46674	0.590579
ENSG00000270117	1.22927	0.909931	1.66067	0.178186
Cluster93	0.695	0.507	0.953	0.0238
Cluster94
ENSG00000260877	0.784572	0.579565	1.06209	0.11104
ENSG00000259854	0.819909	0.482959	1.39194	0.423915
ENSG00000255980	1.26169	0.933731	1.70485	0.132727
ENSG00000255606	1.16443	0.861857	1.57322	0.319145
ENSG00000261347	1.34378	0.745142	2.42336	0.38592
ENSG00000255774	0.807275	0.594819	1.09562	0.160405
Cluster94	0.68	0.5	0.924	0.0138
LUSC
Cluster109
ENSG00000258249	0.814582	0.553019	1.19986	0.291729
ENSG00000257883	1.03472	0.702101	1.52493	0.861643
ENSG00000257654	0.740475	0.486242	1.12763	0.135084
Cluster109	0.633	0.425	0.942	0.0242
Cluster138
ENSG00000259275	0.829897	0.563934	1.22129	0.340828
ENSG00000259542	0.698036	0.473247	1.0296	0.0623607
ENSG00000259312	0.867009	0.193613	3.88251	0.840895
ENSG00000259534	0.637932	0.339768	1.19775	0.0936069
Cluster138	0.572	0.377	0.868	0.00861
Cluster146
ENSG00000261703	0.768642	0.434374	1.36014	0.314644
ENSG00000260042	0.504891	0.190174	1.34044	0.0563627
ENSG00000263082	0.90243	0.612855	1.32883	0.599573
ENSG00000261241	0.919735	0.624933	1.3536	0.669194
Cluster146	0.598	0.387	0.924	0.0204
Cluster17
ENSG00000237720	0.820879	0.417147	1.61536	0.533518
ENSG00000228391	0.852838	0.29072	2.50183	0.754223
ENSG00000234423	1.04163	0.707774	1.53297	0.833767
ENSG00000236760	0.78946	0.532136	1.17122	0.226594
ENSG00000226649	1.4669	0.996111	2.16021	0.0509488
Cluster17	0.542	0.349	0.842	0.00648
Cluster3
ENSG00000237491	1.16708	0.79278	1.71811	0.431615
ENSG00000177757	0.922203	0.626719	1.357	0.678888
ENSG00000225880	0.929253	0.630188	1.37024	0.706977
ENSG00000230368	1.0487	0.712699	1.54311	0.80683
ENSG00000272438	1.00535	0.683236	1.47933	0.978095
ENSG00000230699	1.08042	0.733605	1.59118	0.692128
ENSG00000241180	0.932737	0.633553	1.37321	0.72269
ENSG00000223764	0.695641	0.471588	1.02614	0.0603319
Cluster3	0.596	0.398	0.894	0.0124
Cluster47
ENSG00000249807	1.07021	0.700882	1.63416	0.754648
ENSG00000260515	0.899304	0.61117	1.32328	0.584883
ENSG00000271998	0.887014	0.602812	1.3052	0.537699
ENSG00000272417	1.2723	0.864204	1.8731	0.218189
Cluster47	0.51	0.296	0.879	0.0153
Cluster71
ENSG00000254260	1.83658	0.921183	3.66164	0.17714
ENSG00000254092	0.710345	0.441989	1.14163	0.118016
ENSG00000253147	0.679088	0.394305	1.16955	0.107409
ENSG00000254026	0.63226	0.329518	1.21314	0.094567
ENSG00000253199	0.836201	0.400095	1.74766	0.606291
ENSG00000254040	0.599005	0.285389	1.25725	0.0902852
Cluster71	0.567	0.38	0.846	0.00543
Cluster75
ENSG00000253371	0.803529	0.323668	1.99482	0.601311
ENSG00000253634	0.364389	0.0563142	2.35783	0.0717289
ENSG00000253177	0.720581	0.488455	1.06302	0.0912885
ENSG00000254020	0.575305	0.0922888	3.5863	0.432051
ENSG00000253577	0.68073	0.35418	1.30835	0.176977
Cluster75	0.627	0.405	0.97	0.0361
Cluster78
ENSG00000259820	1.32802	0.90249	1.95418	0.147341
ENSG00000254028	1.4272	0.968996	2.10206	0.0691628
ENSG00000253433	0.902483	0.612892	1.32891	0.598135
ENSG00000251218	1.00129	0.608709	1.64707	0.995921
Cluster78	0.623	0.416	0.933	0.0215
Cluster83
ENSG00000204187	0.856991	0.581905	1.26212	0.430179
ENSG00000226808	0.69103	0.469628	1.01681	0.0613932
ENSG00000236769	1.63439	0.539584	4.95057	0.486245
ENSG00000227029	1.70759	0.778117	3.74732	0.286734
ENSG00000233395	2.68846	0.793009	9.11442	0.303999
Cluster83	0.539	0.363	0.8	0.00217
OV
Cluster1
ENSG00000243485	1.03784	0.81298	1.32488	0.764796
ENSG00000237613	0.928742	0.721729	1.19513	0.561053
ENSG00000238009	0.797159	0.623807	1.01868	0.0665716
ENSG00000239945	0.810106	0.633821	1.03542	0.0885874
Cluster1	0.731	0.571	0.934	0.0124
Cluster104
ENSG00000260597	0.872422	0.682917	1.11451	0.271871
ENSG00000248265	1.23156	0.96437	1.57279	0.0920008
ENSG00000249388	1.27053	0.994883	1.62256	0.05326
ENSG00000250432	1.22391	0.958167	1.56335	0.101546
ENSG00000250742	1.03698	0.812254	1.32388	0.770211
ENSG00000260470	1.22848	0.961563	1.5695	0.0952616
ENSG00000257534	1.13682	0.890642	1.45103	0.301668
Cluster104	0.69	0.536	0.888	0.00391
Cluster123
ENSG00000269927	0.884353	0.692671	1.12908	0.322808
ENSG00000259907	1.03848	0.810753	1.33018	0.765213
ENSG00000258517	0.777157	0.595638	1.01399	0.0509038
ENSG00000269945	1.0515	0.823803	1.34214	0.685691
Cluster123	0.719	0.56	0.924	0.00998
Cluster133
ENSG00000259697	0.973748	0.6665	1.42263	0.889185
ENSG00000259878	1.34562	0.985036	1.83819	0.0884361
ENSG00000261296	0.983112	0.715419	1.35097	0.915769
ENSG00000260957	1.52334	0.985668	2.3543	0.109395
Cluster133	0.593	0.383	0.919	0.0194
Cluster137
ENSG00000259348	1.14322	0.893342	1.46299	0.291849
ENSG00000259702	0.911044	0.713713	1.16293	0.452311
ENSG00000259359	1.05119	0.823525	1.34178	0.687328
ENSG00000259763	0.908664	0.704838	1.17143	0.452316
Cluster137	0.676	0.528	0.866	0.00191
Cluster162
ENSG00000249383	1.10536	0.865986	1.41091	0.420066
ENSG00000249982	2.27873	1.24947	4.15582	0.0598764
ENSG00000249658	1.4423	0.765944	2.7159	0.334797
ENSG00000225860	1.01072	0.773803	1.32017	0.937713
Cluster162	0.724	0.54	0.973	0.0321
Cluster17
ENSG00000237720	1.25824	0.882782	1.79339	0.241517
ENSG00000228391	1.43988	1.00015	2.07296	0.0862099
ENSG00000234423	1.01998	0.7991	1.3019	0.873537
ENSG00000236760	0.99846	0.782033	1.27478	0.99012
ENSG00000226649	0.90977	0.712739	1.16127	0.446687
Cluster17	0.75	0.573	0.982	0.0365
Cluster171
ENSG00000265485	0.933006	0.729841	1.19273	0.575685
ENSG00000263553	0.77255	0.451872	1.3208	0.287178
ENSG00000266573	1.07972	0.845691	1.37851	0.537042
ENSG00000264345	0.856631	0.671052	1.09353	0.212643
Cluster171	0.691	0.538	0.887	0.00374
Cluster18
ENSG00000260476	1.01376	0.790752	1.29966	0.914144
ENSG00000260077	1.1054	0.865904	1.41114	0.418955
ENSG00000272524	1.18364	0.927166	1.51106	0.174755
Cluster18	0.73	0.553	0.964	0.0264
Cluster184
ENSG00000226995	1.14866	0.890356	1.48189	0.292207
ENSG00000230563	0.94229	0.737908	1.20328	0.63208
ENSG00000205181	0.970685	0.760401	1.23912	0.810367
ENSG00000266908	1.0256	0.803496	1.30909	0.838525
ENSG00000225640	0.999496	0.732242	1.36429	0.997451
Cluster184	0.705	0.547	0.91	0.00722
Cluster30
ENSG00000225166	0.95069	0.726877	1.24342	0.708794
ENSG00000228618	1.02074	0.574916	1.8123	0.944505
ENSG00000234938	1.32236	0.807708	2.16495	0.323715
ENSG00000237525	0.99876	0.782432	1.2749	0.992023
Cluster30	0.763	0.588	0.99	0.0417
Cluster36
ENSG00000225742	1.14836	0.899162	1.46663	0.265032
ENSG00000238097	1.16207	0.910406	1.48329	0.225173
ENSG00000228271	0.951111	0.745148	1.214	0.686601
ENSG00000214145	1.00302	0.785821	1.28026	0.980639
Cluster36	0.717	0.557	0.923	0.00998
Cluster41
ENSG00000251432	0.965697	0.756561	1.23264	0.778658
ENSG00000273077	1.14948	0.900501	1.46729	0.262445
ENSG00000248187	0.823729	0.645087	1.05184	0.118091
ENSG00000248802	0.995629	0.77995	1.27095	0.97189
Cluster41	0.772	0.605	0.987	0.0388
Cluster58
ENSG00000272463	1.18208	0.926086	1.50885	0.178787
ENSG00000271727	1.14828	0.899559	1.46577	0.266334
ENSG00000271911	1.13529	0.889379	1.44919	0.305925
ENSG00000272485	1.15097	0.901729	1.4691	0.25846
Cluster58	0.714	0.552	0.924	0.0103
Cluster6
ENSG00000223643	0.957142	0.733536	1.24891	0.744142
ENSG00000230239	1.10613	0.866558	1.41192	0.417156
ENSG00000228549	1.13838	0.891797	1.45315	0.297295
ENSG00000238142	1.13227	0.886551	1.44609	0.31676
ENSG00000272426	1.18129	0.925173	1.5083	0.17853
Cluster6	0.759	0.589	0.979	0.0335
Cluster63
ENSG00000234986	1.04561	0.779111	1.40327	0.768708
ENSG00000213863	1.20693	0.94522	1.5411	0.128826
ENSG00000230423	1.14249	0.895041	1.45834	0.282387
ENSG00000225532	1.25634	0.984047	1.60397	0.0652486
Cluster63	0.724	0.552	0.948	0.0188
Cluster81
ENSG00000235007	0.927799	0.726869	1.18427	0.54653
ENSG00000241084	0.850219	0.665834	1.08566	0.191437
ENSG00000224307	0.921293	0.721762	1.17598	0.509371
ENSG00000268615	0.970332	0.760188	1.23857	0.8086
ENSG00000233901	0.915837	0.717501	1.169	0.47896
Cluster81	0.696	0.544	0.892	0.00411
SKCM
Cluster116
ENSG00000272695	0.844741	0.60476	1.17995	0.31789
ENSG00000237699	1.49678	0.712048	3.14634	0.371427
ENSG00000226921	1.24656	0.788517	1.97066	0.378069
ENSG00000229373	0.928916	0.665355	1.29688	0.66133
ENSG00000260910	0.9265	0.66357	1.29361	0.652571
Cluster116	0.681	0.466	0.994	0.0464
Cluster128
ENSG00000258701	1.12754	0.806887	1.57563	0.478235
ENSG00000258811	1.11477	0.796805	1.55962	0.517998
ENSG00000258593	0.896811	0.642195	1.25238	0.521409
ENSG00000259067	0.962613	0.65827	1.40766	0.842016
Cluster128	0.655	0.466	0.922	0.0151
Cluster137
ENSG00000259348	1.11157	0.793091	1.55795	0.541958
ENSG00000259702	1.1014	0.777202	1.56084	0.591822
ENSG00000259359	0.946805	0.677608	1.32295	0.745175
ENSG00000259763	0.981322	0.702855	1.37012	0.91137
Cluster137	0.65	0.435	0.972	0.0356
Cluster153
ENSG00000261161	1.09081	0.675003	1.76274	0.728884
ENSG00000260026	1.17504	0.549262	2.51379	0.698148
ENSG00000261175	0.978048	0.699065	1.36837	0.896571
Cluster153	0.655	0.445	0.965	0.0323
Cluster173
ENSG00000266743	1.12764	0.77417	1.6425	0.539817
ENSG00000264260	1.21401	0.835909	1.76313	0.325372
ENSG00000264595	1.22606	0.877919	1.71226	0.230272
ENSG00000266014	1.34165	0.906492	1.9857	0.172759
ENSG00000265717	1.19851	0.841905	1.70615	0.327916
ENSG00000264212	0.983228	0.631576	1.53067	0.939606
Cluster173	0.445	0.27	0.732	0.00144
Cluster176
ENSG00000261558	1.95918	0.9439	4.06651	0.174966
ENSG00000261615	0.891534	0.499761	1.59042	0.681188
ENSG00000269543	0.953409	0.635812	1.42965	0.813766
ENSG00000267886	0.977823	0.700316	1.36529	0.895069
Cluster176	0.67	0.474	0.945	0.0226
Cluster182
ENSG00000268307	0.938201	0.671772	1.3103	0.704873
ENSG00000232098	0.77185	0.552788	1.07772	0.126946
ENSG00000268912	0.870807	0.623739	1.21574	0.415221
ENSG00000269473	0.794524	0.569076	1.10929	0.178162
Cluster182	0.648	0.463	0.908	0.0118
Cluster189
ENSG00000234967	2.36999	1.10251	5.09463	0.116879
ENSG00000228503	1.56384	0.951644	2.56987	0.132169
ENSG00000237423	1.3753	0.984938	1.92038	0.0602745
ENSG00000229522	1.88621	1.05767	3.3638	0.0951378
Cluster189	0.514	0.295	0.895	0.0187
Cluster19
ENSG00000223530	0.69945	0.445073	1.09921	0.0807594
ENSG00000233714	0.86808	0.621268	1.21294	0.401884
ENSG00000223634	0.800057	0.572621	1.11783	0.186368
ENSG00000235497	1.38864	0.963306	2.00178	0.0968376
Cluster19	0.593	0.414	0.85	0.0044
Cluster35
ENSG00000236864	1.69466	0.838922	3.4233	0.238378
ENSG00000224187	1.47814	1.027	2.12744	0.0532167
ENSG00000225058	0.570569	0.127249	2.55836	0.32907
ENSG00000236412	0.41734	0.0918786	1.89568	0.0747979
Cluster35	0.531	0.286	0.984	0.0442
Cluster48
ENSG00000248223	0.844146	0.604572	1.17866	0.318125
ENSG00000249199	0.640756	0.343345	1.19579	0.0899411
ENSG00000250822	0.917789	0.517991	1.62616	0.758048
ENSG00000248455	0.809167	0.515901	1.26914	0.315367
ENSG00000249662	0.562362	0.174237	1.81506	0.198941
Cluster48	0.615	0.427	0.887	0.00931
Cluster55
ENSG00000272255	1.1433	0.818912	1.59619	0.424005
ENSG00000250635	0.861793	0.617071	1.20357	0.375583
ENSG00000249526	0.719703	0.514994	1.00578	0.051603
ENSG00000249131	0.882912	0.603006	1.29275	0.50759
ENSG00000251387	0.950851	0.670305	1.34881	0.775121
ENSG00000271792	0.851614	0.472168	1.53599	0.567335
Cluster55	0.66	0.471	0.924	0.0156
Cluster60
ENSG00000272541	0.911026	0.652514	1.27195	0.582332
ENSG00000271761	1.31785	0.941324	1.84498	0.115121
ENSG00000272316	1.12878	0.808237	1.57646	0.473651
ENSG00000225096	0.791829	0.566986	1.10584	0.170026
Cluster60	0.646	0.461	0.907	0.0116
Cluster64
ENSG00000232325	1.20594	0.858641	1.69372	0.286989
ENSG00000242611	1.31642	0.942526	1.83864	0.105165
ENSG00000242474	1.11956	0.801492	1.56386	0.50526
ENSG00000240859	0.907424	0.649537	1.2677	0.566821
ENSG00000261795	1.18104	0.843687	1.65328	0.319468
ENSG00000239715	0.801587	0.473682	1.35648	0.367244
Cluster64	0.591	0.409	0.855	0.00517
Cluster73
ENSG00000253140	1.20152	0.860572	1.67756	0.279265
ENSG00000253688	0.931094	0.66678	1.30018	0.670178
ENSG00000233858	0.943816	0.676035	1.31767	0.733529
ENSG00000253702	0.981543	0.702886	1.37067	0.911896
ENSG00000253455	0.851192	0.583127	1.24249	0.38235
ENSG00000253892	1.5104	0.830488	2.74697	0.251536
Cluster73	0.683	0.477	0.977	0.0368
Cluster90
ENSG00000254653	0.861737	0.601686	1.23418	0.403065
ENSG00000255314	1.29113	0.917424	1.81707	0.152614
ENSG00000255269	1.27177	0.86264	1.87494	0.253386
ENSG00000254639	0.921635	0.65981	1.28736	0.629775
Cluster90	0.633	0.424	0.947	0.026
STAD
Cluster112
ENSG00000255944	0.67315	0.37979	1.19311	0.118795
ENSG00000255998	0.934405	0.531558	1.64255	0.805197
ENSG00000189238	1.12635	0.754735	1.68095	0.557925
ENSG00000256128	1.26753	0.849551	1.89115	0.245799
Cluster112	0.567	0.351	0.916	0.0204
Cluster121
ENSG00000250548	0.713755	0.478362	1.06498	0.100082
ENSG00000258777	0.729419	0.488806	1.08847	0.121625
ENSG00000258667	0.989635	0.663232	1.47668	0.958809
Cluster121	0.643	0.43	0.962	0.0316
Cluster123
ENSG00000269927	0.826961	0.554272	1.23381	0.352119
ENSG00000259907	1.20825	0.807638	1.80756	0.36137
ENSG00000258517	1.0062	0.674384	1.50129	0.97569
ENSG00000269945	1.38745	0.928768	2.07266	0.106105
Cluster123	0.587	0.351	0.981	0.0421
Cluster128
ENSG00000258701	0.949722	0.636397	1.41731	0.800525
ENSG00000258811	0.871814	0.58234	1.30518	0.493417
ENSG00000258593	1.23994	0.830482	1.85128	0.288531
ENSG00000259067	0.980488	0.640527	1.50088	0.927357
Cluster128	0.579	0.382	0.879	0.0103
Cluster132
ENSG00000259616	0.725704	0.437921	1.20261	0.171028
ENSG00000259530	1.1201	0.682673	1.83781	0.663751
ENSG00000259675	0.995709	0.627027	1.58117	0.9854
ENSG00000259284	0.803839	0.416258	1.5523	0.47651
Cluster132	0.597	0.367	0.972	0.038
Cluster171
ENSG00000265485	1.37192	0.91853	2.04909	0.11949
ENSG00000263553	0.962718	0.440433	2.10435	0.922748
ENSG00000266573	1.34593	0.901374	2.00975	0.143959
ENSG00000264345	0.722479	0.483288	1.08005	0.109679
Cluster171	0.56	0.349	0.898	0.0161
Cluster172
ENSG00000267057	0.795291	0.532123	1.18861	0.259613
ENSG00000267399	0.850577	0.474612	1.52436	0.563492
ENSG00000267712	0.884477	0.592838	1.31959	0.546651
ENSG00000267732	1.47436	0.636031	3.41767	0.443469
Cluster172	0.635	0.421	0.959	0.0306
Cluster175
ENSG00000267723	0.972178	0.651615	1.45044	0.889746
ENSG00000267406	0.978562	0.6369	1.50351	0.920821
ENSG00000266913	0.959176	0.64285	1.43116	0.8379
ENSG00000267147	1.21773	0.816171	1.81686	0.333687
Cluster175	0.659	0.438	0.992	0.0457
Cluster176
ENSG00000261558	0.780003	0.452855	1.34349	0.329455
ENSG00000261615	0.749359	0.47581	1.18018	0.184056
ENSG00000269543	0.753792	0.444876	1.27721	0.248408
ENSG00000267886	0.985327	0.660279	1.47039	0.942215
Cluster176	0.602	0.385	0.942	0.0263
Cluster178
ENSG00000266928	0.520406	0.198625	1.36349	0.0706204
ENSG00000267320	0.961011	0.602648	1.53247	0.865069
ENSG00000267238	0.912219	0.516442	1.6113	0.742707
ENSG00000260725	0.93474	0.614386	1.42213	0.749768
ENSG00000267243	1.05936	0.709938	1.58076	0.776924
ENSG00000266893	0.886638	0.561156	1.40091	0.595269
Cluster178	0.474	0.258	0.868	0.0157
Cluster180
ENSG00000267767	0.794342	0.532122	1.18578	0.263223
ENSG00000261754	0.938201	0.628729	1.4	0.754321
ENSG00000269086	0.893228	0.598677	1.3327	0.577388
ENSG00000271109	0.982174	0.657589	1.46697	0.92972
ENSG00000271649	0.716574	0.414454	1.23893	0.180291
ENSG00000270544	1.31962	0.776004	2.24407	0.349691
ENSG00000271171	0.995812	0.564498	1.75668	0.988373
ENSG00000269037	0.936199	0.604673	1.44949	0.764262
ENSG00000270876	0.979163	0.656289	1.46088	0.917708
Cluster180	0.565	0.373	0.857	0.00724
Cluster190
ENSG00000272050	1.09452	0.7314	1.63792	0.661666
ENSG00000260542	1.01341	0.676584	1.51791	0.948403
ENSG00000264490	0.683835	0.42726	1.09448	0.0800081
Cluster190	0.611	0.395	0.945	0.0269
Cluster191
ENSG00000272259	1.32265	0.886313	1.97381	0.170188
ENSG00000125514	0.983755	0.653024	1.48199	0.937202
ENSG00000237119	0.863069	0.525453	1.41761	0.54294
ENSG00000231133	1.13188	0.757626	1.69102	0.542446
ENSG00000225978	1.05311	0.70522	1.57261	0.799193
ENSG00000260416	1.32869	0.828761	2.1302	0.273483
ENSG00000231977	0.871565	0.584157	1.30038	0.500651
Cluster191	0.543	0.327	0.901	0.0182
Cluster199
ENSG00000273145	1.13431	0.760221	1.69247	0.536467
ENSG00000231010	1.32121	0.883877	1.97492	0.169791
ENSG00000235159	0.786219	0.526836	1.17331	0.235792
Cluster199	0.594	0.39	0.904	0.0151
Cluster28
ENSG00000224099	1.30397	0.87315	1.94736	0.189031
ENSG00000271893	1.08359	0.716467	1.63882	0.70576
ENSG00000223466	0.72686	0.484713	1.08997	0.115997
ENSG00000234919	0.883691	0.590478	1.32251	0.544209
Cluster28	0.485	0.244	0.964	0.0388
Cluster37
ENSG00000233987	0.705867	0.424114	1.1748	0.135616
ENSG00000237222	1.03061	0.69034	1.5386	0.882477
ENSG00000230401	0.791052	0.517216	1.20987	0.254472
ENSG00000238031	0.651449	0.382617	1.10917	0.0694913
Cluster37	0.648	0.426	0.984	0.0416
Cluster43
ENSG00000249521	0.641988	0.383265	1.07536	0.053899
ENSG00000248311	0.931674	0.520944	1.66624	0.805966
ENSG00000248467	0.557	0.189794	1.63466	0.158291
ENSG00000249941	0.461169	0.127136	1.67282	0.0834735
Cluster43	0.59	0.359	0.968	0.0366
Cluster51
ENSG00000249335	0.904738	0.587388	1.39354	0.643254
ENSG00000250066	0.801519	0.455669	1.40987	0.405165
ENSG00000249352	1.34187	0.898685	2.0036	0.145097
ENSG00000250237	0.95426	0.639568	1.42379	0.817373
Cluster51	0.618	0.408	0.936	0.0231
Cluster54
ENSG00000212930	0.840932	0.534996	1.32182	0.434476
ENSG00000251093	0.701859	0.413409	1.19157	0.140537
ENSG00000234292	0.914708	0.613061	1.36478	0.662209
ENSG00000248323	1.29189	0.865175	1.92908	0.207901
ENSG00000271762	1.208	0.809236	1.80327	0.353637
Cluster54	0.648	0.432	0.972	0.0361
Cluster56
ENSG00000253792	1.10792	0.60559	2.02692	0.748297
ENSG00000253673	0.884454	0.55962	1.39784	0.585427
ENSG00000253449	0.89463	0.580291	1.37925	0.60659
ENSG00000253424	1.10981	0.693384	1.77632	0.67206
ENSG00000253134	0.685576	0.257703	1.82386	0.365786
ENSG00000254350	0.766744	0.512636	1.14681	0.189322
ENSG00000272085	0.726454	0.375279	1.40625	0.279194
ENSG00000254135	0.655658	0.39276	1.09453	0.066234
Cluster56	0.657	0.433	0.997	0.0484
Cluster67
ENSG00000233559	1.09569	0.734403	1.6347	0.653245
ENSG00000226380	1.03361	0.692706	1.54227	0.869493
ENSG00000271204	0.862878	0.577326	1.28967	0.462771
ENSG00000273319	1.12431	0.75327	1.67811	0.561994
Cluster67	0.61	0.395	0.943	0.0263
Cluster84
ENSG00000237579	0.933089	0.590485	1.47447	0.762736
ENSG00000229649	0.825813	0.545813	1.24945	0.352817
ENSG00000225208	0.860873	0.562692	1.31707	0.47821
ENSG00000230967	0.684578	0.416227	1.12594	0.0954903
Cluster84	0.588	0.382	0.905	0.0158
THCA
Cluster1
ENSG00000243485	0.501509	0.187485	1.3415	0.17179
ENSG00000237613	0.589066	0.219002	1.58446	0.284926
ENSG00000238009	0.83427	0.312928	2.22417	0.718668
ENSG00000239945	1.04738	0.392995	2.79137	0.926137
Cluster1	0.33	0.114	0.949	0.0397
Cluster119
ENSG00000257826	1.14568	0.429021	3.05949	0.785214
ENSG00000257585	0.848753	0.318255	2.26354	0.744288
ENSG00000259104	1.09711	0.41133	2.92621	0.852719
ENSG00000258844	2.8565	1.07178	7.61312	0.0569382
Cluster119	0.179	0.0407	0.79	0.0231
Cluster12
ENSG00000227925	0.862982	0.323464	2.30238	0.769507
ENSG00000238042	1.11301	0.417145	2.96967	0.830117
ENSG00000228437	0.551671	0.206873	1.47115	0.242018
ENSG00000232679	0.522982	0.195812	1.3968	0.221012
ENSG00000236230	0.442809	0.164322	1.19326	0.104473
Cluster12	0.282	0.0976	0.812	0.019
Cluster131
ENSG00000259423	0.874302	0.295086	2.59044	0.803069
ENSG00000259450	0.453913	0.168742	1.22102	0.116371
ENSG00000259447	0.435601	0.0540692	3.50936	0.257466
Cluster131	0.329	0.119	0.905	0.0313
Cluster29
ENSG00000224342	1.38114	0.481086	3.96509	0.574221
ENSG00000234902	0.532282	0.199424	1.42071	0.214167
ENSG00000225916	0.58952	0.221249	1.57078	0.299673
ENSG00000240440	0.563214	0.211281	1.50137	0.259209
ENSG00000229647	1.17474	0.44046	3.13311	0.748954
ENSG00000225064	0.471396	0.0628254	3.53701	0.308106
Cluster29	0.324	0.118	0.892	0.0292
Cluster3
ENSG00000237491	0.49705	0.185743	1.33011	0.166354
ENSG00000177757	0.433311	0.162584	1.15484	0.109964
ENSG00000225880	1.72059	0.641002	4.61846	0.306103
ENSG00000230368	0.911946	0.341914	2.43233	0.853275
ENSG00000272438	1.48405	0.556072	3.96065	0.441121
ENSG00000230699	1.91319	0.716341	5.10974	0.219859
ENSG00000241180	2.70473	1.0138	7.21598	0.0718035
ENSG00000223764	1.90917	0.714784	5.09937	0.221814
Cluster3	0.263	0.075	0.925	0.0373
Cluster71
ENSG00000254260	0.542453	0.139134	2.1149	0.281279
ENSG00000254092	0.455017	0.170776	1.21235	0.13399
ENSG00000253147	1.00683	0.37788	2.68262	0.989127
ENSG00000254026	0.817525	0.306738	2.17888	0.688737
ENSG00000253199	0.968153	0.359795	2.60515	0.948766
ENSG00000254040	1.4415	0.539627	3.85068	0.475655
Cluster71	0.106	0.0141	0.806	0.0301
Cluster76
ENSG00000248599	0.745078	0.279578	1.98564	0.557669
ENSG00000253395	0.532083	0.199347	1.4202	0.213338
ENSG00000253737	1.26637	0.433283	3.70127	0.6816
ENSG00000261087	0.615104	0.229306	1.64999	0.32785
ENSG00000271882	0.672498	0.251999	1.79467	0.438736
ENSG00000253679	1.07593	0.354002	3.27009	0.89904
ENSG00000253282	0.6201	0.18996	2.02424	0.370761
Cluster76	0.331	0.114	0.961	0.042

## Sheet: Additional Table S5
Additional Table S5:Cancer-related signaling pathways of clusters enriched
Term	P.value
Cluster1
Olfactory transduction	0.0651353
Cluster104
Olfactory transduction	1.15772e-10
Cluster109
Ras signaling pathway	0.0115999
Cluster120
GABAergic synapse	0.0132912
Morphine addiction	0.0135885
Circadian entrainment	0.0144801
Cholinergic synapse	0.0167068
Serotonergic synapse	0.0168551
Glutamatergic synapse	0.0170034
Relaxin signaling pathway	0.0193743
Dopaminergic synapse	0.0195224
Apelin signaling pathway	0.0204104
Retrograde endocannabinoid signaling	0.0220371
Hippo signaling pathway	0.0238095
Alcoholism	0.0267589
Kaposi sarcoma-associated herpesvirus infection	0.0276425
Chemokine signaling pathway	0.0282313
Human immunodeficiency virus 1 infection	0.0314655
Human cytomegalovirus infection	0.0333732
Ras signaling pathway	0.0343994
PI3K-Akt signaling pathway	0.052168
Pathways in cancer	0.0774153
Cluster127
Thyroid hormone signaling pathway	0.0230005
Cluster164
Ribosome	0.0302527
Cluster171
Arrhythmogenic right ventricular cardiomyopathy (ARVC)	0.00359995
Cell adhesion molecules (CAMs)	0.00724992
Cluster180
Ribosome biogenesis in eukaryotes	0.0200488
RNA transport	0.0325961
Cluster181
Cluster3
Human papillomavirus infection	0.0798295
Cluster38
Phosphonate and phosphinate metabolism	0.000599909
Bile secretion	0.00718714
Glycerophospholipid metabolism	0.00967662
Choline metabolism in cancer	0.00987564
Cluster51
Basal transcription factors	0.00224996
Nucleotide excision repair	0.00234996
Viral carcinogenesis	0.0100499
Cluster61
Aldosterone-regulated sodium reabsorption	0.00369661
FoxO signaling pathway	0.0131566
mTOR signaling pathway	0.0151425
PI3K-Akt signaling pathway	0.0350874
Cluster93
Spliceosome	0.0133553

## Sheet: Additional Table S6
Additional Table S6: Targeting relationship between CMAP and lincRNA genomic clusters
CMAP small molecule compounds	Cluster
harmalol-5076	Cluster106
methylbenzethonium chloride-4325	Cluster106
Prestwick-1100-4534	Cluster106
bupivacaine-5537	Cluster106
leflunomide-2539	Cluster106
deferoxamine-4317	Cluster106
phenylpropanolamine-5298	Cluster106
promazine-3752	Cluster106
haloperidol-5241	Cluster106
trimethylcolchicinic acid-4202	Cluster106
methazolamide-6268	Cluster106
harmaline-4968	Cluster106
fludrocortisone-3785	Cluster106
staurosporine-423	Cluster106
dirithromycin-2863	Cluster106
mephenytoin-5801	Cluster106
benserazide-5322	Cluster106
guanethidine-5731	Cluster106
naftifine-3536	Cluster106
cyproheptadine-5340	Cluster106
midecamycin-2026	Cluster120
BCB000038-7542	Cluster126
fendiline-7188	Cluster126
AR-A014418-7092	Cluster126
estradiol-7000	Cluster126
5224221-956	Cluster126
pseudopelletierine-7184	Cluster126
acenocoumarol-7232	Cluster126
pyrithyldione-3482	Cluster126
natamycin-7167	Cluster126
labetalol-3167	Cluster126
terfenadine-6823	Cluster126
pridinol-7214	Cluster126
pronetalol-7322	Cluster126
meropenem-7180	Cluster126
chloroquine-7012	Cluster126
calcium folinate-3442	Cluster126
ioxaglic acid-7470	Cluster126
todralazine-1677	Cluster126
glibenclamide-7202	Cluster126
tanespimycin-5958	Cluster127
0179445-0000-3733	Cluster127
CP-944629-7502	Cluster127
CP-320650-01-3825	Cluster127
meclofenoxate-3707	Cluster127
sulfamethoxypyridazine-3711	Cluster127
benzamil-3738	Cluster127
iloprost-488	Cluster127
isosorbide-3720	Cluster127
thalidomide-266	Cluster127
cobalt chloride-454	Cluster127
tropicamide-3722	Cluster127
TTNPB-451	Cluster127
quinpirole-456	Cluster127
PNU-0251126-3692	Cluster127
LM-1685-253	Cluster127
diphenylpyraline-3743	Cluster127
meteneprost-7504	Cluster127
AG-013608-5909	Cluster127
2,6-dimethylpiperidine-3806	Cluster127
L-methionine sulfoximine-4070	Cluster134
trimethobenzamide-4100	Cluster134
sotalol-4079	Cluster134
furazolidone-4098	Cluster134
metacycline-4062	Cluster134
digoxigenin-3397	Cluster134
4-hydroxyphenazone-4095	Cluster134
tobramycin-4081	Cluster134
sitosterol-4073	Cluster134
CP-944629-7497	Cluster134
yohimbic acid-4082	Cluster134
PF-00539745-00-5979	Cluster134
propylthiouracil-4076	Cluster134
STOCK1N-28457-6869	Cluster134
decamethonium bromide-4094	Cluster134
carbenoxolone-4093	Cluster134
thioperamide-3392	Cluster134
valproic acid-433	Cluster134
fasudil-436	Cluster134
tenoxicam-4102	Cluster134
tobramycin-4081	Cluster160
etacrynic acid-5742	Cluster160
acetohexamide-1707	Cluster160
PHA-00851261E-4333	Cluster160
sulfathiazole-1463	Cluster160
amprolium-4825	Cluster160
paracetamol-6284	Cluster160
loxapine-1516	Cluster160
hydrocortisone-5284	Cluster160
naproxen-1828	Cluster160
triamcinolone-5835	Cluster160
2,6-dimethylpiperidine-4543	Cluster160
sulfadiazine-1810	Cluster160
ethisterone-3864	Cluster160
4-hydroxyphenazone-1497	Cluster160
mebendazole-7370	Cluster160
vigabatrin-6314	Cluster160
antimycin A-5053	Cluster160
dacarbazine-6816	Cluster160
clemizole-7371	Cluster160
tretinoin-2671	Cluster164
meclocycline-6637	Cluster164
brinzolamide-1615	Cluster164
novobiocin-576	Cluster164
ambroxol-6719	Cluster164
hesperetin-6750	Cluster164
tretinoin-1548	Cluster164
betahistine-6611	Cluster164
oxolinic acid-2266	Cluster164
pirenzepine-1388	Cluster164
praziquantel-7228	Cluster164
sirolimus-5567	Cluster164
cyclopentolate-3555	Cluster164
tretinoin-1152	Cluster164
sulfadiazine-5098	Cluster164
pirenperone-5274	Cluster164
meticrane-1834	Cluster164
isoniazid-1399	Cluster164
iopanoic acid-6348	Cluster164
labetalol-3167	Cluster171
tiaprofenic acid-4171	Cluster171
ranitidine-2251	Cluster171
tobramycin-4162	Cluster171
dicoumarol-2561	Cluster171
hydralazine-3621	Cluster171
sulfamerazine-3616	Cluster171
ribavirin-6521	Cluster171
alpha-estradiol-5570	Cluster171
orlistat-6420	Cluster171
carteolol-4176	Cluster171
CP-690334-01-4380	Cluster171
nefopam-3627	Cluster171
fludrocortisone-2328	Cluster171
meticrane-5984	Cluster171
sulfamonomethoxine-2742	Cluster171
methanthelinium bromide-3560	Cluster171
butirosin-6080	Cluster171
apramycin-7334	Cluster171
doxycycline-2737	Cluster171
2,6-dimethylpiperidine-4543	Cluster180
sulfadiazine-1810	Cluster180
CP-690334-01-4380	Cluster180
fludrocortisone-2328	Cluster180
doxycycline-2737	Cluster180
suxibuzone-6065	Cluster180
serotonin-3311	Cluster180
triamterene-1819	Cluster180
ifosfamide-5805	Cluster180
withaferin A-3902	Cluster180
sulmazole-4009	Cluster180
minoxidil-1914	Cluster180
lysergol-3261	Cluster180
PHA-00851261E-3776	Cluster180
thiamazole-3898	Cluster180
gemfibrozil-2113	Cluster180
ethisterone-4340	Cluster180
bambuterol-3199	Cluster180
minaprine-1888	Cluster180
colforsin-7055	Cluster180
isosorbide-3720	Cluster19
tropicamide-3722	Cluster19
PF-00539745-00-5979	Cluster19
zuclopenthixol-4843	Cluster19
etiocholanolone-3742	Cluster19
valinomycin-5906	Cluster19
Prestwick-692-4424	Cluster19
lasalocid-6639	Cluster19
captopril-4410	Cluster19
metoprolol-4508	Cluster19
prochlorperazine-4439	Cluster19
valproic acid-4433	Cluster19
PF-01378883-00-6368	Cluster19
sirolimus-5980	Cluster19
dimethadione-5668	Cluster19
letrozole-4824	Cluster19
felbinac-5700	Cluster19
estradiol-4432	Cluster19
3-nitropropionic acid-6372	Cluster19
tolmetin-4167	Cluster19
tropine-6264	Cluster3
rescinnamine-4386	Cluster3
isocorydine-6843	Cluster3
astemizole-1365	Cluster3
bromperidol-1723	Cluster3
prochlorperazine-995	Cluster3
chlormezanone-1620	Cluster3
allantoin-1842	Cluster3
flunisolide-2168	Cluster3
methylprednisolone-1567	Cluster3
thiamine-1744	Cluster3
convolamine-1779	Cluster3
rolipram-3072	Cluster3
cinoxacin-3463	Cluster3
mesoridazine-2874	Cluster3
kanamycin-1609	Cluster3
lobelanidine-1747	Cluster3
prednisone-1978	Cluster3
oxetacaine-1984	Cluster3
7-aminocephalosporanic acid-4826	Cluster3
Prestwick-1100-4534	Cluster38
2,6-dimethylpiperidine-4543	Cluster38
quercetin-4846	Cluster38
midecamycin-6745	Cluster38
disopyramide-7439	Cluster38
apomorphine-5283	Cluster38
piperine-4247	Cluster38
trimethadione-4086	Cluster38
sulfafurazole-4661	Cluster38
BCB000040-7493	Cluster38
chenodeoxycholic acid-7310	Cluster38
berberine-7143	Cluster38
netilmicin-7302	Cluster38
chloropyrazine-3570	Cluster38
cefsulodin-4067	Cluster38
methoxamine-4972	Cluster38
tanespimycin-1206	Cluster38
ethosuximide-7308	Cluster38
trichostatin A-4526	Cluster38
MK-886-264	Cluster38
bupivacaine-5537	Cluster61
5224221-956	Cluster61
brinzolamide-1615	Cluster61
prochlorperazine-995	Cluster61
chlormezanone-1620	Cluster61
disopyramide-7439	Cluster61
fulvestrant-7534	Cluster61
pyrvinium-3518	Cluster61
glafenine-7418	Cluster61
syrosingopine-2753	Cluster61
LY-294002-5587	Cluster61
meclozine-5607	Cluster61
brompheniramine-3271	Cluster61
probenecid-2825	Cluster61
LY-294002-1007	Cluster61
glafenine-7018	Cluster61
rescinnamine-2785	Cluster61
alclometasone-6229	Cluster61
pentoxyverine-2623	Cluster61
doxazosin-3363	Cluster61
pirenzepine-1388	Cluster67
chlormezanone-1620	Cluster67
zidovudine-1595	Cluster67
3-hydroxy-DL-kynurenine-1300	Cluster67
clopamide-1605	Cluster67
tolnaftate-2001	Cluster67
bendroflumethiazide-2555	Cluster67
calmidazolium-486	Cluster67
bezafibrate-1275	Cluster67
Prestwick-981-3125	Cluster67
naltrexone-1363	Cluster67
chlorpromazine-1158	Cluster67
valproic acid-1155	Cluster67
sodium phenylbutyrate-363	Cluster67
metergoline-1606	Cluster67
ritodrine-1280	Cluster67
chlortetracycline-2042	Cluster67
clindamycin-1373	Cluster67
practolol-1587	Cluster67
brinzolamide-1615	Cluster85
zidovudine-1595	Cluster85
morantel-7010	Cluster85
alvespimycin-6172	Cluster85
clomifene-1269	Cluster85
sulfacetamide-1859	Cluster85
celecoxib-922	Cluster85
bacitracin-6488	Cluster85
estradiol-1633	Cluster85
tanespimycin-1218	Cluster85
aconitine-1784	Cluster85
tranexamic acid-1401	Cluster85
cyproheptadine-2021	Cluster85
trichostatin A-4153	Cluster85
oxybuprocaine-1976	Cluster85
genistein-6952	Cluster85
zimeldine-4609	Cluster85
talampicillin-2954	Cluster85
nalidixic acid-2336	Cluster85
brinzolamide-1615	Cluster93
zidovudine-1595	Cluster93
morantel-7010	Cluster93
alvespimycin-6172	Cluster93
clomifene-1269	Cluster93
sulfacetamide-1859	Cluster93
celecoxib-922	Cluster93
bacitracin-6488	Cluster93
estradiol-1633	Cluster93
tanespimycin-1218	Cluster93
aconitine-1784	Cluster93
tranexamic acid-1401	Cluster93
cyproheptadine-2021	Cluster93
trichostatin A-4153	Cluster93
oxybuprocaine-1976	Cluster93
genistein-6952	Cluster93
zimeldine-4609	Cluster93
talampicillin-2954	Cluster93
nalidixic acid-2336	Cluster93
(+/-)-catechin-3351	Cluster126
(+)-isoprenaline-5009	Cluster164
(-)-atenolol-3067	Cluster67
(+/-)-catechin-3012	Cluster85
(+/-)-catechin-3012	Cluster93
